## RESEARCH ARTICLE

# Climate variability and water-related infectious diseases in Pacific Island Countries and Territories, a systematic review

Rose Hosking<sup>1\*</sup>, Kayla Smurthwaite<sup>1</sup>, Simon Hales<sup>2</sup>, Alice Richardson<sup>3</sup>, Suliasi Batikawai<sup>4</sup>, Aparna Lal<sup>1</sup>

**1** National Centre for Epidemiology and Population Health, ANU College of Health and Medicine, Australian National University, Canberra, Australia, **2** Department of Public Health, University of Otago, Wellington, New Zealand, **3** Statistical Support Network, Australian National University, Canberra, Australia, **4** School of Public Health, University of Queensland, Herston Campus, Herston, Australia

\* [Rose.hosking@anu.edu.au](mailto:Rose.hosking@anu.edu.au)

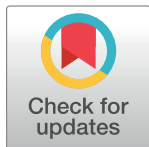

## Abstract

### Background

Climate induced changes in water-related infectious disease (WRID) transmission are a growing public health concern. The effects of climate on disease vary regionally, as do key socioeconomic modifiers. Regional syntheses are necessary to develop public health tools like risk maps and early warning systems at this scale. There is a high burden of WRID in the Pacific Island Countries and Territories (PICTs). There has been significant work on this topic in the PICTs, however, to date, there has been no regional systematic review of climate variability and WRID.

### Methods

We searched the PubMed, Web of Science and Scopus scientific databases in September 2022 using a combination of disease, climate, and country terms. We included studies that evaluated the association between climate or weather variability and a WRID in the PICTs using a quantitative epidemiological design. We assessed risk of bias using validated tools. We analysed spatiotemporal publication patterns, synthesised the outcomes of studies in relation to the international literature and identified missing evidence.

### Results & discussion

We identified 45 studies of climate and malaria, dengue, diarrhoea, leptospirosis, and typhoid, which represent major WRIDs of concern in the Pacific Islands. More than half of the studies were set in Papua New Guinea or Fiji. The number of studies published each year increased exponentially over time from the 1980s to present. We found few comparable outcomes per disease and setting across epidemiological studies which limited the potential for meta-analysis. However, we identified consistent increased incidence of diarrhoea, dengue, leptospirosis, and typhoid following extreme weather events, highlighting the necessity for adequate water, sanitation, and hygiene access across the PICTs.

## OPEN ACCESS

**Citation:** Hosking R, Smurthwaite K, Hales S, Richardson A, Batikawai S, Lal A (2023) Climate variability and water-related infectious diseases in Pacific Island Countries and Territories, a systematic review. *PLOS Clim* 2(10): e0000296. <https://doi.org/10.1371/journal.pclm.0000296>

**Editor:** Asif Qureshi, Indian Institute of Technology Hyderabad, INDIA

**Received:** May 4, 2023

**Accepted:** September 12, 2023

**Published:** October 18, 2023

**Copyright:** © 2023 Hosking et al. This is an open access article distributed under the terms of the [Creative Commons Attribution License](https://creativecommons.org/licenses/by/4.0/), which permits unrestricted use, distribution, and reproduction in any medium, provided the original author and source are credited.

**Data Availability Statement:** All data supporting the findings of this study are available within the article and its [supplementary materials](#).

**Funding:** The authors received no specific funding for this work.

**Competing interests:** The authors have declared that no competing interests exist.

Additionally, there were consistent positive associations between temperature and dengue incidence in New Caledonia, highly seasonal malaria in PNG, increased diarrhoea incidence with high and low rainfall, and positive associations between leptospirosis and rainfall. These findings are biologically plausible and consistent with the international literature. Future work on this topic in the PICTs can take advantage of increasingly available health and climate data to consolidate the field across a greater diversity of settings and apply these findings to strengthening climate resilient health systems.

## Registration

This review is registered with the international prospective register of systematic reviews (PROSPERO [CRD42022353853](https://doi.org/10.1371/journal.pclm.0000296)), in accordance with PRISMA guidelines.

## Introduction

Water-related infectious diseases (WRID) are a global cause of morbidity and mortality, with disproportionate effects in developing countries. WRID are caused by a variety of pathogens including bacteria, protozoa, and viruses. They include waterborne diseases spread by inadequate water, sanitation and hygiene (WASH) (e.g. cholera, typhoid, cryptosporidiosis), and diseases with insect vectors that require water in their lifecycle (e.g. dengue, malaria) [1].

Climate and weather conditions affect WRID pathogen survival, reproduction and spread in the environment, and human interaction with the pathogens [2, 3]. The ways that climate variability affects disease outcomes depends on their transmission mode and relation to water [4]. For example, rainfall and ambient temperature may directly impact the duration of stages of a pathogen's lifecycle, or influence an insect vector's biting rates, breeding site availability and survival [2]. Global reviews have found that rainfall is a key driver of WRID transmission, with increased incidence and outbreaks occurring after rainfall extremes (very high or low rainfall) [2, 3, 5, 6]. Dry periods can concentrate pathogens in water sources and reduce water available for sanitation and hygiene [6, 7]. Extreme water-related events like floods, droughts and hurricanes can also affect WRID incidence by increasing human-pathogen interaction, damaging WASH infrastructure or affecting vector lifecycles and pathogen survival [7].

Concerns that climate change will affect infectious disease outcomes have been growing over the past two decades [8, 9]. To plan for climate induced changes in WRID transmission it is necessary to study associations between climate variability and WRID outcomes [10–12]. Global reviews have identified consistent associations between climate variables and WRID, and in some cases used these to forecast climate-induced changes in disease transmission under climate change scenarios [1, 2, 4, 7, 10, 11, 13].

However, the effects of climate change will not be uniform across the globe and nor will the effects on WRID transmission [9, 14]. Some regions are more vulnerable to the effects of climate change on health depending on their number of climate-sensitive endemic diseases, adaptive capacity, and geographic location [9]. The effects of climate variability on WRID outcomes are also modified by socioeconomic, behavioural, and environmental factors that vary regionally such as WASH access, healthcare access, population density and immunity [13, 15]. For this reason, outbreaks resulting from climate-induced changes in transmission are likely to have disproportionate effects in developing countries and exacerbate existing health inequalities [7, 16]. To implement local and regional public health responses and adaptations,

such as climate based early warning systems (EWS) and risk maps, it is important to conduct regional assessments. There have been regional reviews and analyses of climate variability and WRID in Africa [17], Asia [18, 19], Europe [20, 21], the Arctic [22], and North America [23–25].

Climate-induced changes in infectious disease transmission are a priority health risk in the Pacific Island Countries and Territories (PICTs) [26, 27]. The PICTs are vulnerable to climate challenges due to their geography (small land size, isolation from larger economies), exposure to extreme weather, high natural disaster risk and resource constraints [27, 28]. Resource constraints include small populations, limited technical resources, and incomplete access to WASH facilities and supply. There is a high burden of WRID in the PICTs, especially in the under 5 and over 70 age groups [29, 30]. Ongoing efforts by governments and international organisations in the Pacific are directed towards strengthened public health surveillance, early warning system (EWS) development, WASH infrastructure improvement, promoting community engagement and developing climate resilient health systems [31]. Vulnerability assessments of climate change and infectious diseases have been conducted in some PICTs [32–34]. Kim et al. (2022) conducted a scoping review of climate and health research in the Pacific Islands [35]. However, to date, there has been no comprehensive systematic review of climate variability and WRID in the PICTs [31]. In light of this, the aims of this review are to synthesise the available literature on the effects of climate and weather variability on WRID in the PICTs to identify consistent patterns in the data and highlight gaps in current research. These outcomes are pertinent for climate and health adaptation policy stakeholders in the PICTs who are planning regional health and climate adaptation efforts.

## Objectives

The objectives of this review are to (1) systematically search for and identify published literature, (2) synthesise and assess the quality of evidence and (3) identify gaps in the existing evidence base.

## Methods

This systematic review was designed in accordance with the preferred reporting items for systematic reviews and meta-analysis (PRISMA) guidelines [36].

## Search strategy

One author (RH) searched the databases Web of Science, Scopus, and PubMed in September 2022. Search terms included PICT names, climate and weather terms, and WRID terms described in Table 1. There were no restrictions by publication year or language. We also performed a targeted search of the World Health Organisation (WHO) and United Nations International Children's Fund (UNICEF) websites to identify grey literature. Forwards and backwards citation searching of included articles was undertaken using the citationchaser tool to identify additional literature [37].

## Eligibility criteria

Articles were included in the review if they (i) were set in a PICT (member of the Pacific Community (SPC)) [40], (ii) evaluated the association between a climate or weather variable and a human WRID outcome, and (iii) had a quantitative epidemiological design. We examined WRID that were included in Nichols et al. (2018)'s review of climate change and WRID [1].

Table 1. Database search strategy.

|                                                   |                                                                                   |                                                                                                                                                                                                                                                                                                                                                                                                           |
|---------------------------------------------------|-----------------------------------------------------------------------------------|-----------------------------------------------------------------------------------------------------------------------------------------------------------------------------------------------------------------------------------------------------------------------------------------------------------------------------------------------------------------------------------------------------------|
| <b>Databases</b>                                  | Web of Science, SCOPUS, PubMed                                                    |                                                                                                                                                                                                                                                                                                                                                                                                           |
| <b>Websites</b>                                   | WHO [38], UNICEF [39].                                                            |                                                                                                                                                                                                                                                                                                                                                                                                           |
| <b>Publication date</b>                           | Up to September 2022                                                              |                                                                                                                                                                                                                                                                                                                                                                                                           |
| <b>Language restrictions</b>                      | None                                                                              |                                                                                                                                                                                                                                                                                                                                                                                                           |
| <b>Search to</b>                                  | Topic or Title & abstract                                                         |                                                                                                                                                                                                                                                                                                                                                                                                           |
| <b>Population (setting)</b>                       | From SPC list of 22 PICTs                                                         | (Pacific Island* OR PICT* OR PICs OR 'American Samoa' OR 'Cook Islands' OR 'Federated States of Micronesia' OR Fiji OR 'French Polynesia' OR Guam OR Kiribati OR 'Marshall Islands' OR Nauru OR 'New Caledonia' OR Niue OR 'Northern Mariana Islands' OR Palau OR 'Papua New Guinea' OR 'Pitcairn Islands' OR Samoa OR 'Solomon Islands' OR Tokelau OR Tonga OR Tuvalu OR Vanuatu OR 'Wallis and Futuna') |
| <b>Exposure (climate variables)</b>               | Climate and weather factors                                                       | (Climat* OR weather OR meteorol* OR season* OR temperature OR rain* OR precipitation OR humidity OR cyclone OR hurricane OR flood* OR drought OR 'El Nino' OR 'La Nina' OR ENSO OR heatwave)                                                                                                                                                                                                              |
| <b>Outcome (water-related infectious disease)</b> | Based on Nicholls et al. classification of water-related infectious diseases [1]. | (waterborne OR 'water-related' OR water OR 'infectious disease' OR notif* OR cholera OR dengue OR diarrh* OR hepatitis OR leptospir* OR malaria OR mosquito OR scabies OR trachoma OR typh* OR gastroenteritis OR campylobacter* OR 'eschericia coli' OR giardia* OR salmonell* OR shigell* OR norovirus OR rotavirus OR cryptosporidi*)                                                                  |

<https://doi.org/10.1371/journal.pclm.0000296.t001>

This includes waterborne infections, water-washed, water-based, and water-related insect vectors.

Articles were excluded if they (i) were not set in the PICTs, (ii) had no human-health outcomes (e.g. were entomological studies), (iii) were not focused on a WRID, (iv) had no climate or weather factors (v), studied damp-related, or waterborne chemicals/toxins, (vi) were not quantitative epidemiological studies including systematic reviews, conference or workshop proceedings, case reports, qualitative studies, descriptive studies or (vii) were mechanistic modelling studies. Full inclusion and exclusion criteria can be found in Table 2.

## Selection process

One author (RH) conducted the database, grey literature and citation searches and removed duplicates. Two authors (RH, KS) independently screened record titles and abstracts. Both authors then independently undertook a full-text review of eligible articles. Reasons for

Table 2. Inclusion and exclusion criteria.

|                                    |                                                                                                                                           |
|------------------------------------|-------------------------------------------------------------------------------------------------------------------------------------------|
| <b>Inclusion criteria</b>          | Evaluate association between climate or weather variable and human water-related infectious diseases                                      |
|                                    | Set in a PICT, only 22 SPC members included                                                                                               |
|                                    | Using an empirical quantitative epidemiological study design                                                                              |
|                                    | Published up to September 2022                                                                                                            |
| <b>Exclusion criteria</b>          | Non-Pacific Island setting: not Australia, New Zealand, or Hawaii                                                                         |
|                                    | Non-human health outcomes: animal diseases only, entomological studies or water quality testing                                           |
|                                    | Not a water-related disease pathogen: Not listed in Nichols et al. classification of water-related infectious diseases [1].               |
|                                    | Non-infectious water-related diseases: toxins, and damp-related diseases not included                                                     |
|                                    | No climate or weather factors included                                                                                                    |
| <b>Search strategy limited to:</b> | Alternate design: systematic review, conference/workshop proceedings, case reports, qualitative, descriptive, mechanistic modelling study |
|                                    | Date: Up to September 2022                                                                                                                |
|                                    | No language restrictions unless translation unavailable                                                                                   |

<https://doi.org/10.1371/journal.pclm.0000296.t002>

exclusion were recorded. Conflicts were resolved by discussion with a third reviewer (AL). The titles and abstracts of the additional articles were screened for relevance and excluded using the same criteria.

### Data extraction process

One author (RH) extracted data using an extraction table [41]: including bibliographic information (author, publication year, title, journal), design, setting, population/sample size, disease, study unit (outbreak or cases), outcome and data source, climate exposure variables and data source, temporal (coverage, lags, threshold, resolution), spatial resolution, analytical approach, and key findings related to climate exposures (S1 Table). Outcomes were considered for meta-analysis if (i) there were multiple comparable studies per disease (ii) with similar designs, populations and (iii) the ability to convert to a common effect measure.

### Risk of Bias (ROB) and quality assessment

One author (RH) conducted a ROB assessment using validated tools. Time series analyses (TSA) were assessed using a tool developed by Chua et al. (2022) [42]. The tool includes domains: exposure assessment, outcome assessment, confounding bias, selection bias, selective reporting, and other bias. Options are 'low', 'probably low', 'probably high' and 'high' ROB for each domain. An additional table file shows the tool in more detail (S2 Table). TSA are assigned a 'low' overall ROB if none of the domains were assigned probably high or high risk, 'medium' if one or two domains were, and 'high' if three or more domains with probably high or high risk.

Other study designs were assessed using the Johanna-Briggs Institute Critical appraisal checklist for analytical cross-sectional studies [43]. This tool assesses sample inclusion criteria, subject description, exposure measurement, outcome criteria and measurement, confounding and analytical approach through yes or no questions. Studies are assigned an overall 'low' risk if 'no' was not answered for any domain, a 'medium' risk if no was answered for one or two domains and a 'high' risk if three or more domains were 'no'.

## Results & discussion

### Study selection

The initial database searches yielded 2022 records, 1465 remained after duplicate removal. We excluded 1366 records in title and abstract screening, the remaining 99 records were sought for retrieval. Then, 99 full texts were assessed for eligibility, 36 met the inclusion criteria and were included in the review. An additional 2029 records were identified through forwards and backwards citation searches and nine through grey literature search. Nine full-texts were included after screening, for a total of 45 studies included in the review (Fig 1).

We excluded studies that described patterns in data but did not quantify the association between climatic factors and infectious disease outcomes [33, 44, 45], or were mechanistic modelling studies [46–48].

### Study designs and spatiotemporal trends

The 45 studies of climate and WRID set in the PICTs comprise a small fraction of the global literature on this topic [49]. They are studies of malaria, dengue, diarrhoea, leptospirosis, and typhoid, which represent some of the major climate sensitive WRID of concern in the Pacific Islands [29, 50]. We did not identify studies of chikungunya, cholera, hepatitis A, or Zika despite their potential sensitivity to climate and status as public health concerns in the PICTs

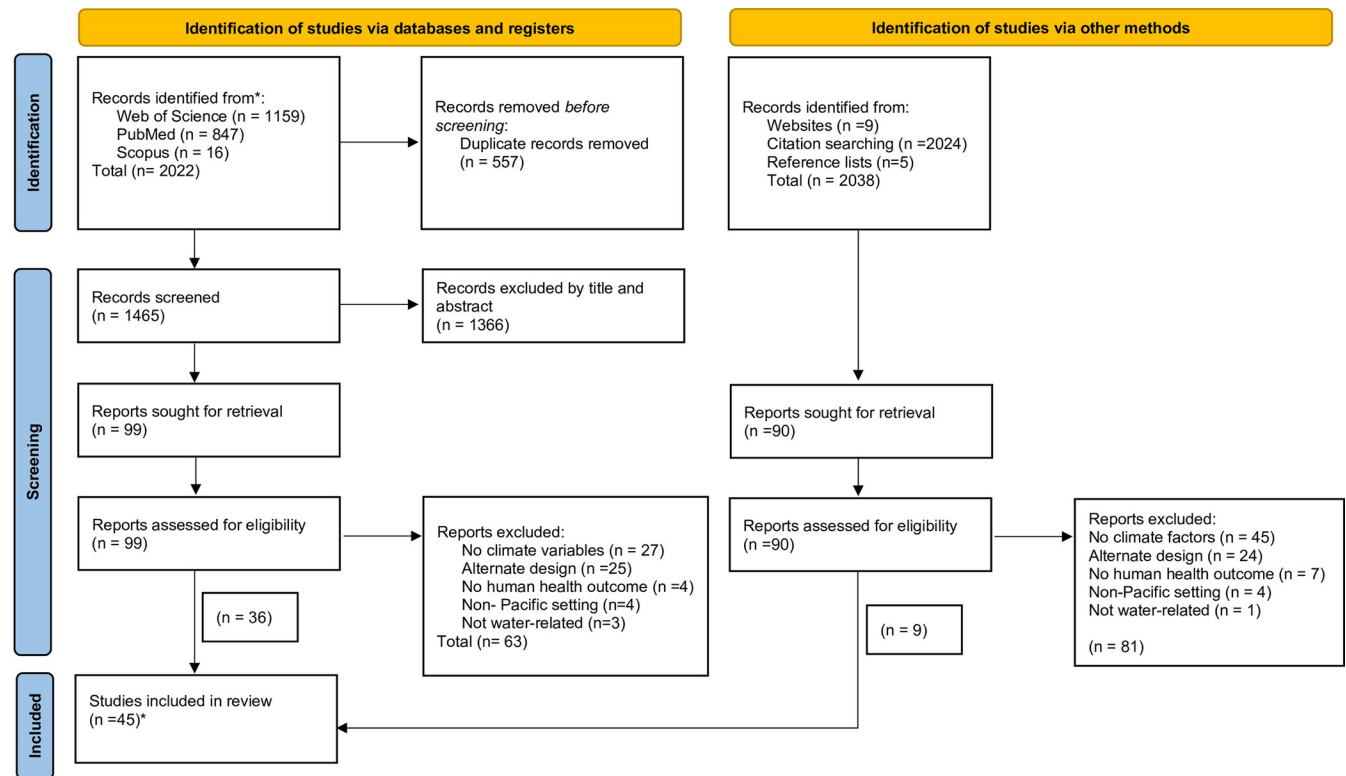

\*45 separate publications including a meta-analysis of 7 studies

Template From: Page MJ, McKenzie JE, Bossuyt PM, Boutron I, Hoffmann TC, Mulrow CD, et al. The PRISMA 2020 statement: an updated guideline for reporting systematic reviews. *BMJ* 2021;372:n71.

**Fig 1. Search and screening strategy and results.**

<https://doi.org/10.1371/journal.pclm.0000296.g001>

[51–53]. Filho et al. (2019) refer to a project, ‘Climate Change and Prevalence Study of Zika Virus Diseases in Fiji’, however, no related peer-reviewed articles were found [53].

Most included studies were TSA. Other designs included outbreak investigations, semi-ecological studies, spatial analyses, longitudinal cohort, and cross-sectional studies. The earliest published studies included were in 1986 [54, 55]. In the decades that followed, the number of quantitative studies of climate and WRID increased exponentially (Fig 2). This trend aligns with a global increase in climate and infectious disease research and improvement in statistical analytical methods [56, 57]. Most examined the effects of temperature and rainfall, or the impacts of extreme events like flood, drought, and cyclones on disease outcomes. Some also included measures of El Niño Southern Oscillation (ENSO), a coupled ocean-atmosphere phenomenon that drives inter-annual climate variability in the Pacific [58, 59]. The ways these variables were measured and aggregated (e.g. average, cumulative, maximum, minimum, thresholds) varied across the studies depending on modelling strategy and data availability.

More than half of the studies were set in Fiji and Papua New Guinea (PNG) (Fig 3). These countries have the highest populations and maintain more complete health and meteorological records than other PICTs [29, 60]. Researchers may also have relationships with governments, academic institutions and other organisations in these countries that allow them to obtain data. Research in PNG has been entirely on malaria. Other settings included American Samoa, Federated States of Micronesia (Micronesia), Wallis and Futuna, New Caledonia, Solomon Islands, Vanuatu, Guam, and the whole South Pacific Region. We did not identify any studies

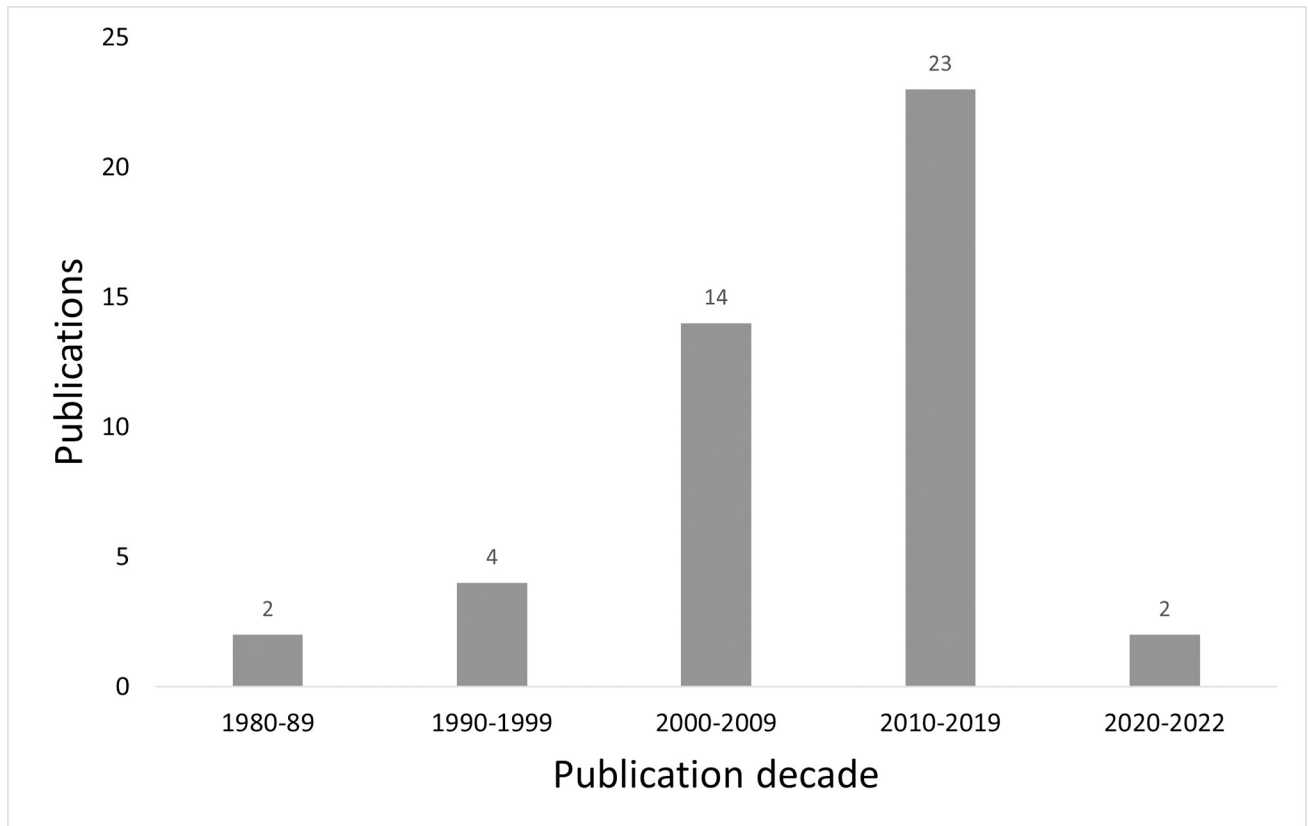

**Fig 2. Number of studies of climate variability and water-related infectious diseases set in the Pacific Island Countries and Territories published by decade from 1980 to present.**

<https://doi.org/10.1371/journal.pclm.0000296.g002>

in the Cook Islands, French Polynesia, Marshall Islands, Nauru, Niue, Northern Mariana Islands, Palau, Pitcairn Islands, Samoa, Tokelau, or Tonga.

### Overview of climate variability and WRID in the PICTs

Overall, we found few comparable outcomes per disease and setting on consistent spatial or temporal scales across the epidemiological studies, which limited the potential for meaningful meta-analysis. Instead we synthesised the results by identifying consistencies and divergences in associations for each disease and climate variable and highlighting gaps in the literature.

### Dengue

Dengue is an arbovirus transmitted by mosquitoes of the *Aedes* genus. Symptoms of infection range from mild fever to severe haemorrhagic fever and death. It is the most commonly reported arbovirus in the PICTs [50]. Global systematic reviews have identified temperature, rainfall, and humidity as key drivers of dengue transmission [61, 62]. We identified nine studies of dengue and climate variability in the PICTs and a tenth study of syndromes related to dengue [63].

Temperature has been shown to increase the replication rate and shorten the extrinsic incubation period of the dengue virus [64]. Three studies in New Caledonia at low risk of bias consistently found positive associations between temperature and dengue [65–67]. Descloux et al. (2012) found a significant correlation between mean annual temperature and annual

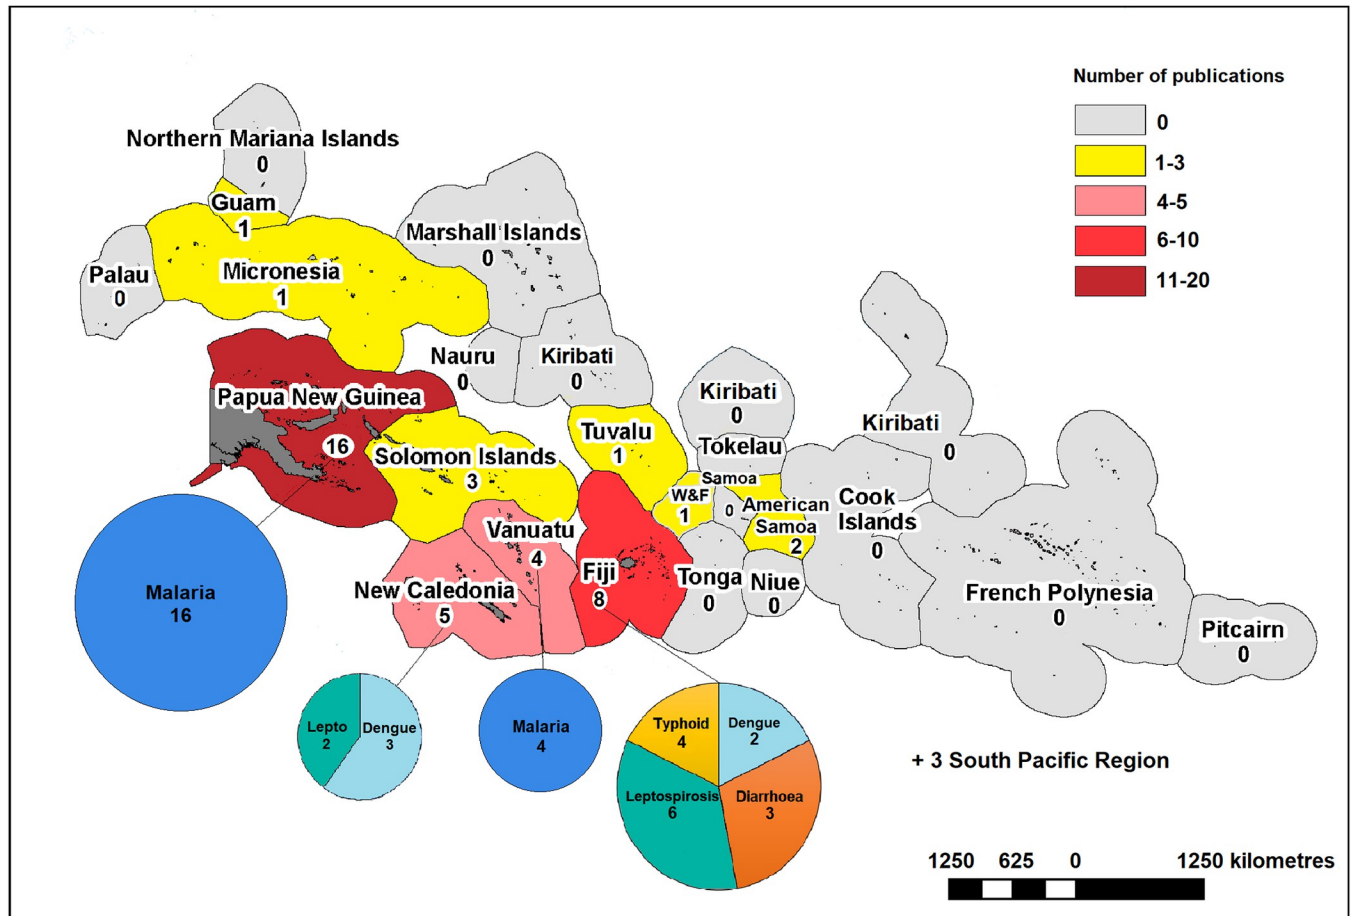

**Fig 3. Distribution of studies of climate variability and water-related infectious diseases across the Pacific Island Countries and Territories.** Base layer (Pacific Data Hub 2019) <https://pacificdata.org/data/dataset/pacific-island-countries-and-territories-exclusive-economic-zones>.

<https://doi.org/10.1371/journal.pclm.0000296.g003>

dengue incidence ( $Rho = 0.436$ ,  $p = 0.007$ ) [65]. Within years that high overall incidence (epidemic years), warm temperatures preceded weekly and monthly increases in dengue incidence and controlled the spatial distribution of dengue [65–67]. These findings align with those of a global meta-analysis of dengue incidence, which found that the risk of dengue infection increases by 7–13% per  $1^{\circ}\text{C}$  increase in high temperatures, and as much as 20% in humid subtropical areas [68].

Findings for rainfall and dengue in the PICTs were mixed, with either no association or positive associations found (Table 3), echoing the international literature [61, 62, 69]. Unlike temperature, rainfall does not directly influence the virus, rather it affects the lifecycle of the mosquito vector by altering the availability of mosquito breeding sites [62]. The relationship is complex because increased rainfall may increase the number of available breeding sites, but human activities (such as storing water) may have a greater influence on dengue than the amount of rainfall. Rainfall does, however, affect humidity, which has been shown to affect mosquito survival and dengue incidence [61]. However, only one study examined humidity and found a positive association. Future studies of climate variability in the PICTs should consider humidity in addition to other local weather variables.

There is evidence that ENSO drives variability in inter-annual dengue incidence in the Asia-Pacific and South America [69–71]. ENSO is a strong driver of inter-annual weather



**Table 3. Summary of studies of dengue and climate variability in the Pacific Island Countries and Territories, by exposure variable, setting and year of publication.**

|                          | Setting | Design  | Outcome    | Resolution, coverage                   | Significant association | ROB  |
|--------------------------|---------|---------|------------|----------------------------------------|-------------------------|------|
| <b>Temperature</b>       |         |         |            |                                        |                         |      |
| Descloux et al. 2012     | NC      | TSA     | IR         | Daily climate 1971–2010                | Positive                | Low  |
| Teurlai et al. 2015      | NC      | TSA     | IR         | Daily 1995–2012                        | Positive                | Low  |
|                          |         | Spatial | IR         | Commune (Municipality of NC)           | Positive                | Low  |
| Ochida et al. 2022       | NC      | TSA     | Cases      | Monthly Cases, Daily climate 1970–2020 | Positive                | Low  |
| McIver et al. 2015       | FSM     | TSA     | Cases      | Daily 2003–2010                        | None                    | Med  |
| <b>Rainfall</b>          |         |         |            |                                        |                         |      |
| Descloux et al. 2012     | NC      | TSA     | IR         | Daily 1971–2010                        | None/unclear            | Low  |
| Teurlai et al. 2015      | NC      | TSA     | IR         | Daily 1995–2012                        | Positive                | Low  |
|                          |         | Spatial | IR         | Commune (Municipality of NC)           | None                    | Low  |
| Ochida et al. 2022       | NC      | TSA     | Cases      | D climate, M cases 1970–2020           | Positive                | Low  |
| McIver et al. 2015       | FSM     | TSA     | Cases      | Daily 2003–2010                        | None                    | High |
| McIver et al. 2012       | Fiji    | TSA     | IR         | Monthly, annual 1995–2009              | None                    | High |
| <b>ENSO</b>              |         |         |            |                                        |                         |      |
| Descloux et al. 2012     | NC      | TSA     | IR         | Daily 1971–2010                        | None                    | Low  |
| McIver et al. 2015       | FSM     | TSA     | Cases      | Daily 2003–2010                        | None                    | Med  |
| Hales et al. 1996        | S Pac   | TSA     | #epidemics | Annual 1970–1996, whole region         | Yes (SOI)               | High |
| Hales et al. 1999        | S Pac   | TSA     | Cases      | Monthly 1973–1994, country             | Yes, by country (SOI)   | Med  |
| <b>Relative humidity</b> |         |         |            |                                        |                         |      |
| Descloux et al. 2012     | NC      | TSA     | IR         | Daily climate 1971–2010                | Positive                | Low  |
| <b>Drought</b>           |         |         |            |                                        |                         |      |
| McIver et al. 2012       | Fiji    | TSA     | IR         | Monthly 1995–2009                      | Positive                | High |
| <b>Flood</b>             |         |         |            |                                        |                         |      |
| Natuzzi et al. 2016      | Sol Is  | TSA     | IR         | Weekly 2013–2015                       | Negative                |      |
| McIver et al. 2012       | Fiji    | TSA     | IR         | Monthly 1995–2009                      | Positive                | High |

FSM = Federated States of Micronesia, NC = New Caledonia, Sol Is = Solomon Islands, S Pac = South Pacific, TSA = Time series analysis, IR = Incidence rate, SOI = Southern Oscillation Index

<https://doi.org/10.1371/journal.pclm.0000296.t003>

variability in the PICTs, [72] but few studies have explored its association with dengue. Hales et al. (1996) found that the annual number of epidemics initiated across the South Pacific region correlated with Southern Oscillation Index (SOI), an ENSO measure ( $R_s = 0.58$ ,  $p = 0.002$ ) [73]. Findings on the presence, direction, and strength of associations between SOI and dengue incidence at national or sub-nation levels varied in a later study [74]. This is unsurprising, given that the strength and effects of ENSO on local weather varies between PICTs, depending on their location [72].

Two studies examined dengue incidence after extreme weather events [75, 76]. Reviews have found that the incidence of mosquito-borne diseases drops may drop immediately after floods as breeding sites are washed away [77, 78]. Natuzzi et al. (2016) found that weekly case numbers were significantly lower than previous years following successive floods in the Solomon Islands [75]. As water stagnates and breeding sites are re-established, disease incidence may rise. This was seen by McIver et al. (2012) who found that the odds of a dengue outbreak increased in the month after floods (OR 10.57) and droughts (OR 5.17) (no confidence intervals provided) in one of the medical subdivisions of Fiji [76]. However, the certainty of these findings is limited by the completeness of the disease data and low occurrence of flood or drought outcomes. The relationship between flood and mosquito-borne disease is complicated by vector control responses [79].

## Malaria

Malaria is a mosquito-borne disease caused by the *Plasmodium* parasite. Several species of *Plasmodium* cause malaria but *P. falciparum* and *P. vivax* are the most common in the PICTs. Malaria can cause fever, headache and vomiting and, if left untreated, is life threatening. It has consistently ranked in the top five diseases for years of life lost and disability-adjusted life years in the PICTs, and is endemic in PNG, Solomon Islands and Vanuatu [29, 80]. All climate and malaria research in the PICTs has been conducted in these settings, with most set in PNG (Fig 3).

Seasonality in *P. falciparum* malaria transmission has been found across the globe, with local variation in key climate drivers and lags [81]. Climate variation contributes to malaria seasonality, along with human behaviour, population dynamics, immunity, and vector abundance [81]. Seven studies in PNG, including a meta-analysis of seven cross-sectional survey studies, consistently found seasonality in *P. falciparum* infections [82–88] (Table 4). The timing of the seasonal peaks varied between studies, which were conducted in different provinces of PNG (for details see S1 Table). Most of the studies gathered incidence or prevalence data through repeated cross-sectional surveys in the wet vs. dry seasons. Differences in the timing peaks are due to variation in the timing and frequency of data collection, as well as true inter-annual and regional differences influenced by local climate variation and non-climatic factors.

Global reviews have found non-linear associations between rainfall and malaria seasonality and incidence [81, 89]. Rainfall influences mosquito density by controlling the availability of stagnant water breeding sites, the relationship is mediated by land type and human activities like water storage and vector control [81, 89]. All studies of monthly rainfall and malaria found it was significantly associated with malaria outcomes, but the direction and strength of association varied over time and space [86–88, 90–92] (Table 4). In PNG, rainfall in the three driest months of the year significantly affected the spatial distribution of malaria [87]. Over time, associations between rainfall and malaria varied in magnitude and direction by province, with different patterns in coastal versus highland regions [86, 90]. In the Solomon Islands, a TSA of monthly data found significant negative associations between rainfall and malaria in the Northern province ( $R^2 = 0.74$ ; 95%CI 0.32–0.88) [92].

Temperature is a key determinant of the global distribution of malaria [93, 94]. This is because temperature affects the extrinsic incubation period of the *Plasmodium* pathogen and the lifecycle and survival of the mosquito vector. Three of four TSA of malaria and climate in the PICTs found that temperature was associated with incidence. In PNG, the direction and strength of associations varied sub-nationally but were positive in the Highland regions [86, 90]. The association was also positive in Vanuatu, with temperatures leading seasonal incidence [88]. Both spatial studies, one in PNG [87] and other in Vanuatu [95], found significant associations between temperature (or proxy variables altitude or distance to coast) and the spatial distribution of malaria.

There is limited available evidence on malaria and extreme weather events in the PICTs. A single study of malaria post floods in the Solomon Islands found case numbers were significantly lower than usual for six months [75]. Reviews have found that malaria incidence, like dengue, initially drops as breeding sites are washed away in floods and then rises again rapidly as water stagnates, but the relationship is also complicated by vector control responses [77, 79].

## Leptospirosis

Leptospirosis is a bacterial zoonosis with a high incidence in the Pacific Islands [103]. Major animal reservoirs include rodents and domestic mammals like livestock and dogs [104]. It is

**Table 4. Summary of studies of malaria and climate variability in the Pacific Island Countries and Territories, by climate exposure, setting and year of publication.**

|                        | Setting | Design  | Outcome | Resolution, coverage                                    | Associations                                                      | ROB <sup>^</sup> |
|------------------------|---------|---------|---------|---------------------------------------------------------|-------------------------------------------------------------------|------------------|
| <b>Seasonality</b>     |         |         |         |                                                         | <b>(For <i>P. falciparum</i>)</b>                                 |                  |
| Cattani et al. 1986    | PNG     | CS      | Fev/SE  | Wet vs dry, 1981–83                                     | None, (fever positivity)                                          | Low              |
| Cox et al. 1994        | PNG     | LC      | IR/PR   | Wet vs dry 1990–1991                                    | Max: Jan- Mar Min: Jul-Sep                                        | Low              |
| Lin et al. 2010        | PNG     | LC      | IR      | Wet vs dry 2006                                         | Max: Aug-Sep, Min: Apr-May                                        | Low              |
| Betuela et al. 2012*   | PNG     | MA      | PR/Epis | Wet vs dry, 2000–2005                                   | >1200m, Max: Mar-Jul                                              | Low              |
| Dimitrov et al. 2013   | PNG     | TSA     | # cases | Wet vs dry 1987–1996                                    | Max: May-June, Min: Sep-Oct                                       | Med              |
| Park et al. 2016       | PNG     | TSA     | IR      | Monthly, 1996–2008                                      | Yes, timing changed coast vs highland                             | Med              |
| Cleary et al. 2021     | PNG     | STA     | PR      | Monthly 1950–2000, 1km <sup>2</sup>                     | Max: Mar-May Min: Nov-Feb                                         | Low              |
| Maitland et al. 1996   | Vanuatu | CS      | IR      | Weekly 1992–1994                                        | None                                                              | Low              |
| Chaves et al. 2008     | Vanuatu | TSA     | IR      | Monthly 1983–1999                                       | Max: Jan-Mar, Min: Jul-Sep                                        | Low              |
| <b>Rainfall</b>        |         |         |         |                                                         |                                                                   |                  |
| Imai et al. 2016       | PNG     | TSA     | IR      | Monthly, 1996–2008                                      | Yes, direction change by region                                   | Med              |
| Park et al. 2016       | PNG     | TSA     | IR      | Monthly, 1996–2008                                      | Yes, direction change by region                                   | Med              |
| Cleary et al. 2021     | PNG     | STA     | IR      | Monthly 1950–2000, 1km <sup>2</sup>                     | Yes, in driest months                                             | Low              |
| Smith et al. 2017      | Sol Is  | STA     | PR      | Monthly 1988–2013                                       | Yes, direction change by region                                   | Low              |
| Chaves et al. 2008     | Vanuatu | TSA     | IR      | Monthly 1983–1999                                       | Yes, inter-annual cycles                                          | Low              |
| Gilbert & Brindle 2009 | Vanuatu | TSA     | IR      | Monthly, annual 1995–2005                               | Positive                                                          | Med              |
| <b>Temperature</b>     |         |         |         |                                                         |                                                                   |                  |
| Imai et al. 2016       | PNG     | TSA     | IR      | Monthly, 1996–2008                                      | Yes, changed by region                                            | Med              |
| Park et al. 2016       | PNG     | TSA     | IR      | Monthly, 1996–2008                                      | Yes, changed by region                                            | Med              |
| Cleary et al. 2021     | PNG     | STA     | PR      | Monthly, long term average, 1950–2000, 1km <sup>2</sup> | Positive (negative with altitude)                                 | Low              |
| Smith et al. 2017      | Sol Is  | TSA     | IR      | Monthly 1988–2013                                       | None                                                              | Low              |
| Chaves et al. 2008     | Vanuatu | TSA     | IR      | Monthly 1983–1999                                       | Positive, seasonal cycles                                         | Low              |
| Reid et al. 2010       | Vanuatu | Spatial | PR      | Infra red 60m grid 2008                                 | None (but negative associations with altitude, distance to coast) | Med              |
| <b>ENSO</b>            |         |         |         |                                                         |                                                                   |                  |
| Imai et al. 2016       | PNG     | TSA     | IR      | Monthly, 1996–2008                                      | Yes, changed by region                                            | Med              |
| Smith et al. 2017      | Sol Is  | TSA     | IR      | Monthly 1988–2013                                       | None                                                              | Low              |
| Gilbert & Brindle 2009 | Vanuatu | TSA     | IR      | Monthly, annual 1995–2005                               | None                                                              | Med              |
| Chaves et al. 2008     | Vanuatu | TSA     | IR      | Monthly 1983–1999                                       | None                                                              | Low              |
| <b>Flood</b>           |         |         |         |                                                         |                                                                   |                  |
| Natuzzi et al. 2016    | Sol Is  | TSA     | IR      | Weekly, 2013–15                                         | Negative, significantly lower following floods                    | Low              |

CS = cross-sectional, LC = longitudinal cohort, MA = meta-analysis, PNG = Papua New Guinea, Sol Is = Solomon Islands, STA = spatiotemporal analysis, TSA = time series analysis, IR = incidence rate, Fev = Fever positivity, PR = Prevalence rate, SE = splenic enlargement, Epis = Epidemics, ROB = Risk of Bias

\* Meta-analysis of Mueller et al. 2003a [96], Mueller et al. 2003b [97], Mueller et al. 2004 [98], Mueller et al. 2005 [99], Mueller et al. 2006 [100], Mueller et al. 2007a [101], Mueller et al. 2007b [102].

<https://doi.org/10.1371/journal.pclm.0000296.t004>

spread to humans through contaminated water and soil or direct contact with infected animals. We identified nine studies that quantified the association between climate variables and leptospirosis in the PICTs [76, 105–113].

Rainfall has been found to be a key determinant of leptospirosis transmission [114, 115]. Rainfall was a significant predictor of the number of leptospirosis cases or incidence rates in four TSA conducted in Fiji, Wallis and Futuna, and New Caledonia (Table 5). The association was positive in three of these studies, while the direction of the association was not provided in the fourth study in Fiji due to missing outcome data. Additionally, Berlioz-Arthaud et al.

**Table 5. Summary of studies of leptospirosis and climate variability in the Pacific Island Countries and Territories, by exposure variable, setting and year of publication.**

| Rainfall                    | Setting | Design             | Outcome | Resolution, coverage  | Significant associations  | ROB  |
|-----------------------------|---------|--------------------|---------|-----------------------|---------------------------|------|
| Lau et al. 2012a            | AmSam   | CS                 | Sero+   | Annual 2010           | None                      | Med  |
| Lau et al. 2012b            | AmSam   | CS                 | Sero+   | Annual 2010           | None                      | Med  |
| McIver et al. 2012          | Fiji    | TSA                | IR      | Mon/An, 1995–2009     | Yes, (direction np)       | High |
| Lau et al. 2017             | Fiji    | CS                 | Sero+   | Annual 1971–2000      | Positive                  | Low  |
| Mayfield et al. 2018a       | Fiji    | Spatial            | Sero+   | Annual 1971–2000      | Yes, by region            | Low  |
| Mayfield et al. 2018b       | Fiji    | Spatial            | Sero+   | 100m raster           | None                      | Low  |
| Massenet et al. 2015        | W & F   | Retro surveillance | # cases | District, 2004–2014   | Positive                  | Med  |
| Weinberger et al. 2014      | NC      | TSA                | # cases | Monthly 2000–2012     | Positive                  | Low  |
| <b>Temperature</b>          |         |                    |         |                       |                           |      |
| McIver et al. 2012          | Fiji    | TSA                | IR      | Monthly, 1995–2009    | Direction np              | High |
| Berlioz-Arthaud et al. 2007 | NC      | TSA                | # cases | Monthly 2001–2005     | Direction np, at 2-3m lag | Med  |
| Weinberger et al. 2014      | NC      | TSA                | # cases | Monthly 2000–2012     | None                      | Low  |
| <b>Flood</b>                |         |                    |         |                       |                           |      |
| Lau et al. 2012a            | Am Sam  | CS                 | Sero+   | 2010 annual           | None                      | Med  |
| Lau et al. 2012b            | Am Sam  | CS                 | Sero+   | 2010 annual           | None                      | Med  |
| Lau et al. 2017             | Fiji    | CS                 | Sero+   | Annual 1971–2000      | Positive                  | Low  |
| Togami et al. 2018          | Fiji    | Outbreak           | # cases | Weekly 12/2011–5/2012 | Positive                  | Low  |
| <b>ENSO</b>                 |         |                    |         |                       |                           |      |
| Berlioz-Arthaud et al. 2007 | NC      | TSA                | # cases | Monthly 2001–2005     | Yes                       | Med  |
| Weinberger et al. 2014      | NC      | TSA                | # cases | Monthly 2000–2012     | Yes                       | Low  |

Am Sam = American Samoa, NC = New Caledonia, W & F = Wallis and Futuna, CS = Cross-sectional, TSA = Time series analysis, Mon = monthly, An = annual, Sero+ = seropositivity, np = not provided

<https://doi.org/10.1371/journal.pclm.0000296.t005>

(2007) reported that confirmed cases of leptospirosis in New Caledonia were four times greater during a La Niña (wetter) period than an El Niño (drier) period, but other potential confounders were not accounted for [105]. Cross-sectional studies in Fiji and American Samoa had mixed findings. High maximum rainfall in Fiji's wettest months (275–789mm), was positively associated with the presence of *Leptospira* antibodies (OR 1.003 for a 1mm increase in rainfall) [106]. In American Samoa, average annual rainfall was not significantly associated with seropositivity or a driver of its spatial distribution [107, 108], possibly due to limited exposure contrast caused by high levels of rainfall across the study sites.

Warmer temperatures have been found to increase leptospirosis incidence by promoting the growth and survival of the bacteria [114, 115]. However, there were a limited number of studies of temperature and leptospirosis in the PICTs, as most research has focused on rainfall. In New Caledonia, leptospirosis incidence peaked 2–3 months after the highest mean monthly temperatures, but rainfall was not directly considered, and an effect estimate was not provided [105]. Similarly, in Fiji, temperature was associated with leptospirosis incidence, but the direction of the association was not specified [76]. Further studies are needed to better understand the relationship between temperature and leptospirosis in the PICTs.

Leptospirosis outbreaks have been linked to flood events in tropical developing countries [114]. In Fiji, Togami et al. (2018) found cases spiked in the 2–6 weeks after successive floods [109]. In Fiji, Lau et al. (2017) found a distance of <100m between a major river or creek and home as a proxy for flood risk increased risk of seropositivity (OR 1.41 (95% CI: 1.09, 1.83)) [106]. Two cross sectional studies in American Samoa found no association between living in a “flood risk zone” and seropositivity [107, 108]. However the authors indicated that flood risk

was based on insurance maps that were inaccurate indicators of actual flooding based on reported participant experiences. Collection of health data post-flood event is difficult but represents a research gap for leptospirosis and climate studies in the PICTs.

## Diarrhoea

Diarrhoea is a leading cause of global death and morbidity, with a high burden in the Pacific, especially in the under 5 and over 70 age groups [29]. Diarrhoea can be caused by bacteria, protozoa, viruses, or toxins spread through contaminated food, water or person-person contact [15]. Associations between climate and diarrhoea are complex and can vary based on pathogen-specific responses and local environmental conditions, so examining general patterns of diarrhoea may yield different results to pathogen-specific approaches. There were nine studies of diarrhoea outcomes and climate in the PICTs, including two that were pathogen specific: a study of non-typhoidal salmonella [55] and an outbreak investigation in the Solomon Islands that typed diarrhoeal pathogens [116] (Table 6).

Global reviews have found positive associations between ambient temperature and all cause diarrhoea [4, 117, 118]. Singh et al. (2001) analysed data from 18 PICTs and found a positive correlation between average annual temperatures and diarrhoea counts ( $R^2 = 0.49$ ,  $p < 0.05$ ) [119]. There are a limited number of national analyses of diarrhoea and climate with higher resolution data in the PICTs, only one provided effect estimates. Singh et al. (2001) also conducted a TSA of monthly infant (<1 year) diarrhoea in Fiji (1978–1998) and found a 1 °C temperature increase led to a 3% (95%CI: 1.2–5.0%) increase in cases in the following month and higher diarrhoea rates at rainfall extremes (U shape relationship) [119]. This finding is similar to a global meta-analysis of 26 studies of all cause diarrhoea and ambient temperature, which found an incidence rate ratio of 1.07 (95% CI: 1.03,1.10) [120]. A later TSA (1995–2009) of monthly diarrhoea in Fiji found associations in some states over time lags (pseudo  $R^2$  0.06–0.10) but the direction of these associations was not provided [76]. A study of weekly syndromic surveillance data in Fiji found temperature did not influence variation in bloody and watery diarrhoea [63].

The relationship between rainfall and diarrhoea is complex and non-linear. International studies have reported U-shaped associations with increased rates at rainfall extremes [15, 120]. Studies in the PICTs of rainfall and diarrhoea echoes these findings (Table 6). Two TSA studies found U-shaped relationships between monthly diarrhoea incidence and rainfall in Fiji at one-month lags [76, 119]. Nelson et al (2022) found that rainfall explained the most variance in watery and bloody diarrhoea across Fiji, with cases peaking several weeks after rainfall [63]. The timing of these peaks is likely to be pathogen specific. One study in FSM did not find any associations with rainfall, but substantial gaps in the disease data were reported by the authors [32].

Diarrhoea outbreaks have occurred after extreme events in the PICTs. Diarrhoea rates have been found to spike after flooding, where pathogens are washed into water sources and WASH infrastructure is overwhelmed [120]. Two outbreak investigations in the Solomon Islands confirmed higher case numbers in the weeks following a 2014 flood compared to previous years [75, 116]. In Fiji, McIver et al. reported an increased risk of outbreaks in the month following a flood (OR 3.5), (no confidence intervals provided) [76]. At the other extreme, drought may concentrate diarrhoeal pathogens in water sources and reduce the quantity of water available for hygiene and sanitation [121]. In Tuvalu, weekly diarrhoea cases exceeded 2 standard deviations above historical means during a drought linked to a La Niña event in 2011 [121]. Through a case-control study the authors also found that low water tank reserves and decreased handwashing were significantly correlated with diarrhoea ( $p < 0.01$ ).

**Table 6. Summary of studies of diarrhoea and climate variability in the Pacific Island Countries and Territories, by exposure variable, setting and year of publication.**

|                        | Setting | Design | Outcomes       | Resolution, coverage                | Associations            | ROB  |
|------------------------|---------|--------|----------------|-------------------------------------|-------------------------|------|
| <b>Temperature</b>     |         |        |                |                                     |                         |      |
| Singh et al. 2001      | S Pac   | TSA    | # cases adult  | Annual, 1986–1994                   | Positive                | Med  |
|                        | Fiji    | TSA    | # cases infant | Monthly, 1978–1998                  | Positive at 1m lag only | Low  |
| McIver et al. 2012     | Fiji    | TSA    | IR             | Monthly, 1995–2009                  | Yes                     | Med  |
| Nelson et al. 2022     | Fiji    | TSA    | IR             | Weekly 2016–20                      | None                    | Low  |
| McIver et al. 2015     | FSM     | TSA    | # cases        | Daily 2003–2010                     | U Shape                 | Med  |
| Emont et al. 2017      | Tuvalu  | TSA    | AR             | Weekly 2000–2013, monthly 2008–2013 | None                    | Med  |
| <b>Rainfall</b>        |         |        |                |                                     |                         |      |
| Singh et al. 2001      | Fiji    | TSA    | # cases child  | Monthly, 1978–1989                  | U shape                 | Low  |
| McIver et al. 2012     | Fiji    | TSA    | IR             | Monthly, 1995–2010                  | U shape at 1m lag       | Med  |
| Nelson et al. 2022     | Fiji    | TSA    | IR             | Weekly 2016–2020                    | None                    | Low  |
| McIver et al. 2015     | FSM     | TSA    | # cases        | Daily 2003–2010                     | None                    | Med  |
| Haddock & Malilay 1986 | Guam    | TSA    | Salmonella IR  | Monthly 1977–1984                   | Yes, annual /monthly    | High |
| Jones et al. 2016      | Sol Is  | OBI    | IR, MR         | Outbreak 2014                       | Positive                | Low  |
| Emont et al. 2017      | Tuvalu  | OBI    | AR             | Weekly 2000–2013, monthly 2008–2013 | Negative                | Med  |
| <b>ENSO</b>            |         |        |                |                                     |                         |      |
| McIver et al. 2015     | FSM     | TSA    | # cases        | Daily 2003–2010                     | U shape, one state      | Med  |
| <b>Drought</b>         |         |        |                |                                     |                         |      |
| McIver et al. 2012     | Fiji    | TSA    | IR             | Monthly, 1995–2009                  | Positive                | Med  |
| Emont et al. 2017      | Tuvalu  | TSA    | AR             | Weekly 2000–2013, monthly 2008–2013 | Positive                | Med  |
| <b>Flood</b>           |         |        |                |                                     |                         |      |
| McIver et al. 2012     | Fiji    | TSA    | IR             | Monthly, 1995–2009                  | Positive                | Med  |
| Jones et al. 2016      | Sol Is  | OBI    | IR             | 2014 Outbreak                       | Positive                | Low  |
| Natuzzi et al. 2016    | Sol Is  | OBI    | IR             | 2014 Outbreak                       | Positive                | Low  |
| <b>Other</b>           |         |        |                |                                     |                         |      |
| McIver et al. 2012     | Fiji    | TSA    | IR             | Monthly, 1995–2009                  | Humidity: None          | Med  |
| Nelson et al. 2022     | Fiji    | TSA    | IR             | Daily clim, weekly d 2016–2020      | Seasonality: Mar- Apr   | Low  |

ROB = risk of bias, Sol IS = Solomon Islands, FSM = Federated States of Micronesia, OBI = outbreak investigation, IR = incidence rate, AR = attack rate

<https://doi.org/10.1371/journal.pclm.0000296.t006>

## Typhoid fever

Typhoid fever is an infection transmitted by ingestion of food or water containing faeces with *Salmonella enterica* serovar *Typhi* bacterium. It is endemic in some PICTS, including Fiji [122]. Outbreaks have been described after cyclones and floods [123], but only three studies in Fiji, conducted at different spatial scales, quantified associations between climate and typhoid outcomes [76, 124, 125] (Table 7). An additional study analysed syndromes related to typhoid in Fiji (watery diarrhoea, bloody diarrhoea and prolonged fever) but not confirmed cases [63]. Two spatial analyses in Fiji found that “flood risk” areas (based on topography, hydrology, distance to water and elevation) had higher typhoid incidences [124, 125]. Findings of these studies for weather variables were mixed. A lack of climate variability and typhoid studies represents a research gap in the PICTs.

## ROB and quality assessment

Most of the included studies were at a low or medium overall ROB. Studies were at a medium or high of bias due to concerns in exposure or outcome assessment, or inadequate accounting

**Table 7. Summary of studies of typhoid fever and climate variability in the Pacific Island Countries and Territories, by exposure variable, setting and year of publication.**

|                      | Setting | Design      | Outcome | Resolution, coverage            | Associations      | ROB |
|----------------------|---------|-------------|---------|---------------------------------|-------------------|-----|
| <b>Rainfall</b>      |         |             |         |                                 |                   |     |
| McIver et al. 2012   | Fiji    | TSA         | IR      | Monthly,1995–2009               | Yes, direction np | Med |
| Jenkins et al. 2016  | Fiji    | STA         | IR      | Monthly 2013–2015 Sub-catchment | None              | Low |
| De Alwis et al. 2018 | Fiji    | CS/spatial  | Sero+   | Community                       | Positive          | Low |
| <b>Temperature</b>   |         |             |         |                                 |                   |     |
| McIver et al. 2012   | Fiji    | TSA         | IR      | Monthly,1995–2009               | Yes, direction np | Med |
| Jenkins et al. 2016  | Fiji    | STA         | IR      | Monthly 2013–2015 Sub-catchment | None              | Low |
| De Alwis et al. 2018 | Fiji    | CS/Spatial  | Sero+   | Household                       | None              | Low |
| <b>Flood -</b>       |         |             |         |                                 |                   |     |
| Jenkins et al. 2016  | Fiji    | STA         | IR      | 2013–2015 sub-catchment         | Positive          | Low |
| De Alwis et al. 2018 | Fiji    | CS/ Spatial | Sero+   | Household                       | Positive          | Low |

TSA = Time series analysis, STA = spatiotemporal analysis, CS = Cross sectional, IR = incidence rate

<https://doi.org/10.1371/journal.pclm.0000296.t007>

for confounding (see S3 and S4 Tables). These potential biases are common in observational epidemiological studies of environmental exposures [18]. Potential confounders for TSA include long-term data trends and seasonality, or meteorological variables that are not controlled for [126]. For example, in some studies examining the association between rainfall and disease outcomes, temperature was not accounted for (or vice versa). Many studies also did not account for sociodemographic variables which can confound spatial associations with climate variables.

Further, several of the TSA used monthly climate data but did not provide information on the completeness of the data or reported substantial gaps in the data. Additionally, some studies used data from only one weather station, usually due to this being the only available data, as a proxy for an entire region or country. This renders it difficult to assess the accuracy of the exposure classifications and limits exposure contrast across the study sites.

## Summary and applications

We identified 45 studies that quantified associations between climate variability and WRID outcomes in the PICTs. While the amount of research on this area in the PICTs has increased over the past decades, there were geographic restrictions in the scope. The studies were largely concentrated in PNG and Fiji, with a limited number set in other PICTs. Synthesis of the findings by disease and climate variable revealed the following consistent findings:

1. Positive associations between temperature and dengue incidence, and the potential for outbreaks post-drought and flood,
2. Highly seasonal malaria with associations with rainfall and temperature varying sub-nationally,
3. Increased diarrhoea incidence at high and low rainfall levels and post- drought and flood,
4. Positive associations between leptospirosis and rainfall and flooding,
5. Associations between typhoid and flooding.

These associations are all biologically plausible and supported by broader international literature [2, 56]. Given the high frequency of extreme weather events that occur in the PICTs

[127], these findings indicate that high alert for outbreaks of diarrhoea, dengue, leptospirosis, and typhoid is necessary during and post-disaster. Access to safe drinking water, rebuilding of WASH facilities and reduced contact with contaminated water are a priority to reduce public health burden. As climate change is predicted to increase the frequency of extreme weather events, ongoing investment in improved WASH access in the PICTs is necessary to buffer against the effect of climate change on public health [128].

Integration of climate and health data is a critical component of building climate resilient health systems [129]. In several cases where no associations were found, authors stated a lack of exposure contrast across their study sites (e.g. very high levels of rainfall) as potential a reason for this. In some cases, this may be because data were not available at a fine enough spatial or temporal resolution to detect associations (e.g. when data from only one weather station was used) [130]. In other studies, periods of missing health data were reported. Missing or inconsistent health or climate data is an ongoing issue in the PICTs where surveillance and collection resources can be limited [31, 60]. However, data is increasingly available and accessible through initiatives such as the Pacific climate change data portal [131], the Pacific Public Health Surveillance Network [132], and The Pacific data hub [133].

Geographic limitations in the scope of research underscore the need for future studies in diverse settings across the PICTs to enhance the applicability of the evidence for public health responses. Despite limitations, the patterns of consistent findings identified in this review indicate the potential for development of climate based EWS, risk maps and disease forecasting under climate change scenarios in the PICTs.

Climate-based EWS can alert communities and health authorities about the increased risk of disease outbreaks during specific climate conditions, allowing for timely interventions and preventive measures [28]. Climate-based EWS for infectious diseases are in place across the world, for example, there are ENSO-based EWS for hantavirus pulmonary syndrome, Rift Valley Fever, cholera, and dengue [134, 135]. The potential for climate-based EWS in the PICTs has been discussed and establishment frameworks proposed [136]. However, the authors are aware of one previously operational EWS in the PICTs, Malaclim, developed from the results of Smith et al. (2017) for malaria risk in the Solomon Islands [137]. Further research may build on some of the consistencies identified through this review, like highly seasonal malaria in PNG, to enable the establishment of other EWS.

Associations between climate variables and WRID outcomes are also useful for the development of risk maps. Risk maps can be used by health authorities, policymakers, and other stakeholders to allocate resources. For example, Mayfield and colleagues developed risk maps for leptospirosis based on associations between climate variables, environment, and disease outcomes [112, 113]. The body of evidence identified in this review also offers the potential for projecting disease burdens and risk mapping under climate change scenarios. For instance, research on dengue in New Caledonia was used to project annual incidence and spatial evolution up to 2100 [65–67]. Future studies on climate and WRID in the PICT may incorporate updated emissions scenarios to forecast disease patterns using long-term climate and disease data.

## Limitations

This review is limited to studies that quantified associations between climate variables and WRID. Mechanistic studies were excluded but are important for understanding transmission dynamics and designing control strategies. For examples of mechanistic climate and WRID research in the PICTs, see Henderson et al. (2021)'s study of Zika in Fiji [48] or Kucharski et al. (2018)'s of dengue transmission in Fiji [46]. We also excluded a considerable number of



entomological studies in the PICTs, which are important for understanding how climate can impact the transmission dynamics of vector borne diseases.

Further, our search terms included broad terms and some, but not all, specific WRID terms (e.g. cholera, hepatitis). We did not find studies of Zika and chikungunya that matched or inclusion criteria, but these were not specific search terms. While it is expected the broader terms and full citation searches would identify literature on these diseases, it is possible that exclusion of these terms missed important literature. Finally, while we identify patterns of associations in light of potential biases, we did not conduct a meta-analysis. Limited data availability, and heterogeneity in climate indicators (measurements, aggregations, lags, and values) and analytical approaches precluded meaningful quantitative summaries within the scope of this review and is an area for future research.

## Conclusion

We observed associations between climate variability and some WRID in the PICTs that were both biologically plausible and consistent with the international literature. Future research on this topic may take advantage of increasingly available data to consolidate the field across a greater diversity of settings and increase application of the evidence to the development of effective control strategies and interventions like EWS, forecasting and risk maps. Today, WASH access must be prioritised and strengthened across the PICTs to reduce the impacts of WRID on human health during and following extreme weather events.

## Supporting information

**S1 Table. Extracted information from studies of climate variability and water-related infectious diseases in the Pacific Island Countries and Territories, by disease, setting and year of publication.**

(XLSX)

**S2 Table. Risk of bias tool developed by Chua et al. (2022) in a review of climate variability and diarrhoea for assessment for time-series analyses.**

(DOCX)

**S3 Table. Risk of bias assessment for included time-series analyses, by disease and year of publication.**

(XLSX)

**S4 Table. Risk of bias assessment for included studies, cross-sectional designs, by disease and year of publication.**

(XLSX)

**S1 File. PRISMA checklist.**

(DOCX)

## Author Contributions

**Conceptualization:** Rose Hosking, Simon Hales, Aparna Lal.

**Data curation:** Rose Hosking, Alice Richardson.

**Investigation:** Rose Hosking, Kayla Smurthwaite, Alice Richardson.

**Methodology:** Rose Hosking, Kayla Smurthwaite, Simon Hales, Alice Richardson, Suliasi Bati-kawai, Aparna Lal.

**Supervision:** Kayla Smurthwaite, Simon Hales, Aparna Lal.

**Visualization:** Rose Hosking.

**Writing – original draft:** Rose Hosking.

**Writing – review & editing:** Rose Hosking, Kayla Smurthwaite, Simon Hales, Alice Richardson, Suliasi Batikawai, Aparna Lal.

## References

1. Nichols G, Lake I, Heaviside C. Climate Change and Water-Related Infectious Diseases. *Atmosphere*. 2018; 9(10):385.
2. Guzman Herrador BR, de Blasio BF, MacDonald E, Nichols G, Sudre B, Vold L, et al. Analytical studies assessing the association between extreme precipitation or temperature and drinking water-related waterborne infections: a review. *Environ Health*. 2015; 14(1):29. <https://doi.org/10.1186/s12940-015-0014-y> PMID: 25885050
3. Semenza JC, Herbst S, Rechenburg A, Suk JE, Höser C, Schreiber C, et al. Climate Change Impact Assessment of Food- and Waterborne Diseases. *Crit Rev Env Sci Tec*. 2012; 42(8):857–90. <https://doi.org/10.1080/10643389.2010.534706> PMID: 24808720
4. Levy K, Smith SM, Carlton EJ. Climate Change Impacts on Waterborne Diseases. *Moving Toward Designing Interventions*. *Curr Environ Health Rep*. 2018; 5(2):272–82.
5. Yang K, LeJeune J, Alsdorf D, Lu B, Shum CK, Liang S. Global Distribution of Outbreaks of Water-Associated Infectious Diseases. *PLOS Negl Trop Dis*. 2012; 6(2):e1483. <https://doi.org/10.1371/journal.pntd.0001483> PMID: 22348158
6. Erickson TB, Brooks J, Nilles EJ, Pham PN, Vinck P. Environmental health effects attributed to toxic and infectious agents following hurricanes, cyclones, flash floods and major hydrometeorological events. *J Toxicol Environ Health B Crit Rev*. 2019; 22(5–6):157–71. <https://doi.org/10.1080/10937404.2019.1654422> PMID: 31437111
7. Cann KF, Thomas DR, Salmon RL, Wyn-Jones AP, Kay D. Extreme water-related weather events and waterborne disease. *Epidemiol Infect*. 2013; 141(4):671–86. <https://doi.org/10.1017/S0950268812001653> PMID: 22877498
8. Patz JA, Campbell-Lendrum D, Holloway T, Foley JA. Impact of regional climate change on human health. *Nature*. 2005; 438(7066):310–317. <https://doi.org/10.1038/nature04188> PMID: 16292302
9. Patz JA, Grabow ML, Limaye VS: When It Rains, It Pours. *Future Climate Extremes and Health*. *Annals of Global Health*. 2014; 80(4):332–344.
10. Semenza JC, Hoser C, Herbst S, Rechenburg A, Suk JE, Frechen T, et al. Knowledge Mapping for Climate Change and Food- and Waterborne Diseases. *Crit Rev Env Sci Tech*. 2012; 42(4):378–411.
11. Cissé G, McLeman R, Adams H, Aldunce P, Bowen K, Campbell-Lendrum D, et al. 2022. Health, Well-being, and the Changing Structure of Communities. In: *Climate Change 2022: Impacts, Adaptation, and Vulnerability*. Contribution of Working Group II to the Sixth Assessment Report of the Intergovernmental Panel on Climate Change. 2022.
12. World Health Organisation. Operational framework for building climate resilient health systems. Geneva, Switzerland; 2015. Report No: 9789241565073.
13. Semenza JC. Cascading risks of waterborne diseases from climate change. *Nat Immunol*. 2020; 21(5):484–7. <https://doi.org/10.1038/s41590-020-0631-7> PMID: 32313241
14. Koh S, Lee M, Brotzman LE, Shelton RC. An orientation for new researchers to key domains, processes, and resources in implementation science. *Trans Behav Med*. 2018; 10(1):179–185.
15. Levy K, Woster AP, Goldstein RS, Carlton EJ. Untangling the Impacts of Climate Change on Waterborne Diseases: a Systematic Review of Relationships between Diarrheal Diseases and Temperature, Rainfall, Flooding, and Drought. *Environ Sci Technol*. 2016; 50(10):4905–22. <https://doi.org/10.1021/acs.est.5b06186> PMID: 27058059
16. McMichael AJ. Globalization, Climate Change, and Human Health. *N Engl J Med*. 2013; 368(14):1335–43. <https://doi.org/10.1056/NEJMra1109341> PMID: 23550671
17. Thomson MC, Muñoz ÁG, Cousin R, Shumake-Guillemot J. Climate drivers of vector-borne diseases in Africa and their relevance to control programmes. *Infect Dis Poverty*. 2018; 7(4):15–36. <https://doi.org/10.1186/s40249-018-0460-1> PMID: 30092816
18. Teymouri P, Dehghanzadeh R. Climate change and water-related diseases in developing countries of Western Asia: a systematic literature review. *Climate and Development* 2021; 14(3):222–238.

19. Phung D, Huang C, Rutherford S, Chu C, Wang X, Nguyen M. Climate change, water quality, and water-related diseases in the Mekong Delta Basin: a systematic review. *Asia Pac J Public Health*. 2015; 27(3):265–276. <https://doi.org/10.1177/1010539514565448> PMID: 25563349
20. Semenza JC, Menne B. Climate change and infectious diseases in Europe. *Lancet Infect Dis*. 2009; 9(6):365–375. [https://doi.org/10.1016/S1473-3099\(09\)70104-5](https://doi.org/10.1016/S1473-3099(09)70104-5) PMID: 19467476
21. Habib RR, Zein KE, Ghanawi J. Climate Change and Health Research in the Eastern Mediterranean Region. *EcoHealth*. 2010; 7(2):156–175. <https://doi.org/10.1007/s10393-010-0330-1> PMID: 20658168
22. Harper SL, Wright C, Masina S, Coggins S. Climate change, water, and human health research in the Arctic. *Water Secur*. 2020; 10:100062.
23. Patz JA, Vavrus SJ, Uejio CK, McLellan SL. Climate Change and Waterborne Disease Risk in the Great Lakes Region of the U.S. *Am J Prev Med*. 2008; 35(5):451–458. <https://doi.org/10.1016/j.amepre.2008.08.026> PMID: 18929971
24. Curriero FC, Patz JA, Rose JB, Lele S. The Association Between Extreme Precipitation and Waterborne Disease Outbreaks in the United States, 1948–1994. *Am J Pub Health*. 2001; 91(8):1194–1199. <https://doi.org/10.2105/ajph.91.8.1194> PMID: 11499103
25. Trtanj J, Jantarasami L, Brunkard JM, Collier TK, Jacobs JM, Lipp EK, et al. Ch. 6: Climate Impacts on Water-Related Illness. In: *The Impacts of Climate Change on Human Health in the United States: A Scientific Assessment*. Washington, DC. U.S. Global Change Research Program; 2016. pp. 157–188.
26. McIver L, Kim R, Woodward A, Hales S, Spickett J, Katscherian D, et al. Health Impacts of Climate Change in Pacific Island Countries: A Regional Assessment of Vulnerabilities and Adaptation Priorities. *Environ Health Perspect*. 2016; 124(11):1707–14. <https://doi.org/10.1289/ehp.1509756> PMID: 26645102
27. World Health Organisation. Regional Office for the Western Pacific. Climate change and health in Small Island Developing States: a WHO special initiative, Pacific island countries and areas: Manila, WHO Regional Office for the Western Pacific; 2018.
28. Craig AT, Kaldor J, Schierhout G, Rosewell AE. Surveillance strategies for the detection of disease outbreaks in the Pacific islands: meta-analysis of published literature, 2010–2019. *Tropical Medicine & International Health* 2020; 25(8):906–918. <https://doi.org/10.1111/tmi.13448> PMID: 32446271
29. Hoy D, Roth A, Viney K, Souares Y, Lopez AD. Findings and implications of the Global Burden of Disease 2010 Study for the Pacific Islands. *Preventing chronic disease* 2014, 11:E75–E75. <https://doi.org/10.5888/pcd11.130344> PMID: 24809361
30. Troeger C, Blacker BF, Khalil IA, Rao PC, Cao S, Zimsen SRM, et al. Estimates of the global, regional, and national morbidity, mortality, and aetiologies of diarrhoea in 195 countries: a systematic analysis for the Global Burden of Disease Study 2016. *The Lancet Infectious Diseases* 2018, 18(11):1211–1228. [https://doi.org/10.1016/S1473-3099\(18\)30362-1](https://doi.org/10.1016/S1473-3099(18)30362-1) PMID: 30243583
31. World Health Organisation. Human health and climate change in Pacific island countries. Manila, Philippines; WHO Regional Office for the Western Pacific, 2015.
32. McIver L, Hashizume M, Kim H, Honda Y, Pretrick M, Iddings S, et al. Assessment of Climate-sensitive Infectious Diseases in the Federated States of Micronesia. *Trop Med Health*. 2015; 43:29–40. <https://doi.org/10.2149/tmh.2014-17> PMID: 25859151
33. McIver L, Woodward A, Davies S, Tibwe T, Iddings S. Assessment of the Health Impacts of Climate Change in Kiribati. *Int J Environ Res Public Health*. 2014; 11(5):5224–5240. <https://doi.org/10.3390/ijerph110505224> PMID: 24830452
34. de Wet N, Hales S. Chapter 7: Human Health. In: Feresi J, Kenny G, de Wet N, Limalevu L, Bhusan J, Ratukalou I eds. *Climate change vulnerability and adaptation assessment for Fiji*. Hamilton, New Zealand. International Global Change Institute. 2000. pp. 96–135.
35. Kim H, Ryan A, Harding AB, Moskowitz AF, Passe AI, Kawazu EC. Health risks of climate change in the 21 Pacific Island states and noted gaps in scientific evidence: A scoping review. *The Journal of Climate Change and Health* 2022, 8:100166.
36. Page MJ, McKenzie JE, Bossuyt PM, Boutron I, Hoffmann TC, Mulrow CD, et al. The PRISMA 2020 statement: an updated guideline for reporting systematic reviews. *Systematic Reviews* 2021, 10(1):89.
37. Haddaway NR. citationchaser: an R package for forward and backward citations chasing in academic searching. In., vol. 0.0.1: Zenodo; 2021.
38. World Health Organization. Publications. World Health Organization, 2021. Available from: <https://www.who.int/publications>

39. United Nations Children's Fund (UNICEF). UNICEF Publications: UNICEF, 2019. Available from: <https://www.unicef.org/reports>
40. (SPC) The Pacific Community. Our Members 2021. Available from: <https://www.spc.int/our-members/>
41. Li T HJ, Deeks JJ. Chapter 5: Collecting data. In: Cochrane Handbook for Systematic Reviews of Interventions. Higgins JPT TJ, Chandler J, Cumpston M, Li T, Page MJ, Welch VA eds., version 6.3 (updated February 2022) edn: Cochrane; 2022.
42. Chua PLC, Ng CFS, Tobias A, Seposo XT, Hashizume M. Associations between ambient temperature and enteric infections by pathogen: a systematic review and meta-analysis. *Lancet Planet Health*. 2022; 6(3):e202–e18. [https://doi.org/10.1016/S2542-5196\(22\)00003-1](https://doi.org/10.1016/S2542-5196(22)00003-1) PMID: 35278387
43. Moola S MZ, Tufanaru C, Aromataris E, Sears K, Sfetcu R, Currie M, et al. 2020. Chapter 7: Systematic reviews of etiology and risk. In: JBI Manual for Evidence Synthesis [Internet]. Available from: <https://synthesismanual.jbi.global>
44. Ashford DA, Savage HM, Hajjeh RA, McReady J, Bartholomew DM, Spiegel RA, et al. Outbreak of dengue fever in Palau, Western Pacific: risk factors for infection. *Am J Trop Med Hyg*. 2003; 69(2):135–40. PMID: 13677368
45. Laille M, Huerre M, Dubourdieu H, Flye Sainte Marie F. [Dengue epidemic in New Caledonia (1989). Environmental factors and prevention]. *Bull Soc Pathol Exot* 1993; 86(5 Pt 2):442–449.
46. Kucharski AJ, Kama M, Watson CH, Aubry M, Funk S, Henderson AD, et al. Using paired serology and surveillance data to quantify dengue transmission and control during a large outbreak in Fiji. *eLife*. 2018; 7(NA):1–26. <https://doi.org/10.7554/eLife.34848> PMID: 30103854
47. Ross A, Koepfli C, Schoepflin S, Timinao L, Siba P, Smith T, et al. The Incidence and Differential Seasonal Patterns of Plasmodium vivax Primary Infections and Relapses in a Cohort of Children in Papua New Guinea. *PLoS Negl Trop Dis*. 2016; 10(5):e0004582. <https://doi.org/10.1371/journal.pntd.0004582> PMID: 27144482
48. Henderson AD, Kama M, Aubry M, Hue S, Teissier A, Naivalu T, et al. Interactions between timing and transmissibility explain diverse flavivirus dynamics in Fiji. *Nat Commun*. 2021; 12(1):1671. <https://doi.org/10.1038/s41467-021-21788-y> PMID: 33723237
49. Sweileh WM. Bibliometric analysis of peer-reviewed literature on climate change and human health with an emphasis on infectious diseases. *Globalization and Health*. 2020; 16:1–17.
50. Matthews RJ, Kaluthotage I, Russell TL, Knox TB, Horwood PF, Craig AT. Arboviral Disease Outbreaks in the Pacific Islands Countries and Areas, 2014 to 2020: A Systematic Literature and Document Review. *Pathogens*. 2022; 11(1). <https://doi.org/10.3390/pathogens11010074> PMID: 35056022
51. Kline K, McCarthy JS, Pearson M, Loukas A, Hotez PJ. Neglected Tropical Diseases of Oceania: Review of Their Prevalence, Distribution, and Opportunities for Control. *PLoS Negl Trop Dis*. 2013; 7(1):e1755. <https://doi.org/10.1371/journal.pntd.0001755> PMID: 23383349
52. Fischer GE, Thompson N, Chaves SS, Bower W, Goldstein S, Armstrong G, et al. The epidemiology of hepatitis A virus infections in four Pacific Island nations, 1995–2008. *Trans R Soc Trop Med Hyg*. 2009; 103(9):906–10. <https://doi.org/10.1016/j.trstmh.2009.05.001> PMID: 19520409
53. Filho WL, Scheday S, Boenecke J, Gogoi A, Maharaj A, Korovou S. Climate Change, Health and Mosquito-Borne Diseases: Trends and Implications to the Pacific Region. *Int J Environ Res Public Health*. 2019; 16(24).
54. Cattani JA, Tulloch JL, Vrbova H, Jolley D, Gibson FD, Moir JS, et al. The epidemiology of malaria in a population surrounding Madang, Papua New Guinea. *Am J Trop Med Hyg*. 1986; 35(1):3–15. <https://doi.org/10.4269/ajtmh.1986.35.3> PMID: 3511748
55. Haddock RL, Malilay J. The possible role of rainfall in spreading Salmonella on Guam. *J Diarrhoeal Dis Res*. 1986; 4(4):229–32. PMID: 3668194
56. Liang L, Gong P. Climate change and human infectious diseases: A synthesis of research findings from global and spatio-temporal perspectives. *Environ Int*. 2017; 103:99–108. <https://doi.org/10.1016/j.envint.2017.03.011> PMID: 28342661
57. Rohr JR, Dobson AP, Johnson PTJ, Kilpatrick AM, Paull SH, Raffel TR, et al. Frontiers in climate change–disease research. *Trends Ecol Evol*. 2011; 26(6):270–7. <https://doi.org/10.1016/j.tree.2011.03.002> PMID: 21481487
58. McGregor GR, Ebi K. El Niño Southern Oscillation (ENSO) and Health: An Overview for Climate and Health Researchers. *Atmosphere*. 2018; 9(7):282.
59. Murphy BF, Power SB, McGree S. The Varied Impacts of El Niño Southern Oscillation on Pacific Island Climates. *J Clim*. 2014; 27(11):4015–36.
60. World Health Organisation. Health information systems in the Pacific at a glance 2016. Manila, Philippines. World Health Organizational Regional Office for the Western Pacific. 2017.

61. Naish S, Dale P, Mackenzie JS, McBride J, Mengersen K, Tong S. Climate change and dengue: a critical and systematic review of quantitative modelling approaches. *BMC Infect Dis*. 2014; 14(1):167. <https://doi.org/10.1186/1471-2334-14-167> PMID: 24669859
62. Morin CW, Comrie AC, Ernst K. Climate and dengue transmission: evidence and implications. *Environmental health perspectives* 2013; 121(11–12):1264–1272. <https://doi.org/10.1289/ehp.1306556> PMID: 24058050
63. Nelson S, Jenkins A, Jupiter SD, Horwitz P, Mangubhai S, Abimbola S, et al. Predicting climate-sensitive water-related disease trends based on health, seasonality and weather data in Fiji. *J Clim Change Health*. 2022; 6:100112.
64. Thai KT, Anders KL. The role of climate variability and change in the transmission dynamics and geographic distribution of dengue. *Exp Biol Med (Maywood)* 2011; 236(8):944–954. <https://doi.org/10.1258/ebm.2011.010402> PMID: 21737578
65. Descloux E, Mangeas M, Menkès CE, Lengaigne M, Leroy A, Tehei T, et al. Climate-Based Models for Understanding and Forecasting Dengue Epidemics. *Plos Neglect Trop Dis*. 2012; 6(2):e1470–NA. <https://doi.org/10.1371/journal.pntd.0001470> PMID: 22348154
66. Ochida N, Mangeas M, Dupont-Rouzeyrol M, Dutheil C, Forfait C, Peltier A, et al. Modeling present and future climate risk of dengue outbreak, a case study in New Caledonia. *Environ Health*. 2022; 21(1):20. <https://doi.org/10.1186/s12940-022-00829-z> PMID: 35057822
67. Teurlai M, Menkès CE, Cavarero V, Degallier N, Descloux E, Grangeon JP, et al. Socio-economic and Climate Factors Associated with Dengue Fever Spatial Heterogeneity: A Worked Example in New Caledonia. *Plos Neglect Trop Dis*. 2015; 9(12):e0004211–NA. <https://doi.org/10.1371/journal.pntd.0004211> PMID: 26624008
68. Damtew YT, Tong M, Varghese BM, Anikeeva O, Hansen A, Dear K, et al. Effects of high temperatures and heatwaves on dengue fever: a systematic review and meta-analysis. *eBioMedicine* 2023; 91:104582. <https://doi.org/10.1016/j.ebiom.2023.104582> PMID: 37088034
69. Banu S, Hu WB, Hurst C, Tong SL. Dengue transmission in the Asia-Pacific region: impact of climate change and socio-environmental factors. *Trop Med Int Health*. 2011; 16(5):598–607. <https://doi.org/10.1111/j.1365-3156.2011.02734.x> PMID: 21320241
70. van Panhuis WG, Choisy M, Xiong X, Shong Chok N, Akarasewi P, Lamsirithaworn S, et al. Region-wide synchrony and traveling waves of dengue across eight countries in Southeast Asia. *Proc Natl Acad Sci USA*. 2015; 112(42):13069–13074. <https://doi.org/10.1073/pnas.1501375112> PMID: 26438851
71. Pramanik M, Singh P, Kumar G, Ojha VP, Dhiman RC. El Niño Southern Oscillation as an early warning tool for dengue outbreak in India. *BMC Public Health*. 2020; 20(1):1498.
72. Murphy BF, Power SB, McGree S. The Varied Impacts of El Niño–Southern Oscillation on Pacific Island Climates. *J Clim*. 2014; 27(11):4015–4036.
73. Hales S, Weinstein P, Woodward A. Dengue fever epidemics in the South Pacific: driven by El Niño Southern Oscillation? *Lancet*. 1996; 348(9042):1664–1665.
74. Hales S, Weinstein P, Souares Y, Woodward A. El Niño and the dynamics of vectorborne disease transmission. *Environ Health Perspect*. 1999; 107(2):99–102.
75. Natuzzi ES, Joshua C, Shortus M, Reubin R, Dalipanda T, Ferran K, et al. Defining Population Health Vulnerability Following an Extreme Weather Event in an Urban Pacific Island Environment: Honiara, Solomon Islands. *Am J Trop Med Hyg*. 2016; 95(2):307–14. <https://doi.org/10.4269/ajtmh.16-0177> PMID: 27091867
76. McIver LJ, Naicker J, Hales S, Singh S, Dawainavesi A. Climate change and health in Fiji: environmental epidemiology of infectious diseases and potential for climate-based early warning systems. *Fiji J Pub Health*. 2012; 1(1):7–13.
77. Suhr F, Steinert JI. Epidemiology of floods in sub-Saharan Africa: a systematic review of health outcomes. *BMC Public Health*. 2022; 22(1):268. <https://doi.org/10.1186/s12889-022-12584-4> PMID: 35144560
78. Coalson JE, Anderson EJ, Santos EM, Garcia VM, Romine JK, Luzingu JK, et al. The Complex Epidemiological Relationship between Flooding Events and Human Outbreaks of Mosquito-Borne Diseases: A Scoping Review. *Environ Health Perspect*. 2021; 129(9):096002. <https://doi.org/10.1289/EHP8887> PMID: 34582261
79. Ahern M, Kovats RS, Wilkinson P, Few R, Matthies F. Global Health Impacts of Floods: Epidemiologic Evidence. *Epidemiol Rev*. 2005; 27(1):36–46. <https://doi.org/10.1093/epirev/mxi004> PMID: 15958425
80. Maitland K, Williams TN, Bennett S, Newbold CI, Peto TEA, Viji J, et al. The interaction between *Plasmodium falciparum* and *P-vivax* in children on Espiritu Santo island, Vanuatu. *Trans Roy Soc Trop Med Hyg*. 1996; 90(6):614–20.

81. Reiner RC Jr., Geary M, Atkinson PM, Smith DL, Gething PW. Seasonality of Plasmodium falciparum transmission: a systematic review. *Malar J.* 2015; 14:343. <https://doi.org/10.1186/s12936-015-0849-2> PMID: 26370142
82. Cox MJ, Kum DE, Tavul L, Narara A, Raiko A, Baisor M, et al. Dynamics of malaria parasitaemia associated with febrile illness in children from a rural area of Madang, Papua New Guinea. *Trans R Soc Trop Med Hyg.* 1994; 88(2):191–7. [https://doi.org/10.1016/0035-9203\(94\)90292-5](https://doi.org/10.1016/0035-9203(94)90292-5) PMID: 8036670
83. Lin E, Kiniboro B, Gray L, Dobbie S, Robinson L, Laumaea A, et al. Differential Patterns of Infection and Disease with *P. falciparum* and *P. vivax* in Young Papua New Guinean Children. *PLoS One.* 2010; 5(2):e9047. <https://doi.org/10.1371/journal.pone.0009047> PMID: 20140220
84. Betuela I, Maraga S, Hetzel MW, Tandrapah T, Sie A, Yala S, et al. Epidemiology of malaria in the Papua New Guinean highlands. *Trop Med Int Health.* 2012; 17(10):1181–91. <https://doi.org/10.1111/j.1365-3156.2012.03062.x> PMID: 22925472
85. Dimitrov BD, Valev D, Werner R, Atanassova PA. Cyclic patterns of cerebral malaria admissions in Papua New Guinea for the years 1987–1996. *Epidemiol Infect.* 2013; 141(11):2317–27. <https://doi.org/10.1017/S0950268812003111> PMID: 23339988
86. Park JW, Cheong HK, Honda Y, Ha M, Kim H, Kolam J, et al. Time trend of malaria in relation to climate variability in Papua New Guinea. *Environ Health Toxicol.* 2016; 31:e2016003. <https://doi.org/10.5620/eht.e2016003> PMID: 26987606
87. Cleary E, Hetzel MW, Siba PM, Lau CL, Clements ACA. Spatial prediction of malaria prevalence in Papua New Guinea: a comparison of Bayesian decision network and multivariate regression modelling approaches for improved accuracy in prevalence prediction. *Malar J.* 2021; 20(1):269. <https://doi.org/10.1186/s12936-021-03804-0> PMID: 34120604
88. Chaves LF, Kaneko A, Taleo G, Pascual M, Wilson ML. Malaria transmission pattern resilience to climatic variability is mediated by insecticide-treated nets. *Malar J.* 2008; 7:100. <https://doi.org/10.1186/1475-2875-7-100> PMID: 18518983
89. Caminade C, Kovats S, Rocklöv J, Tompkins AM, Morse AP, Colon-Gonzalez FJ, et al. Impact of climate change on global malaria distribution. *Proc Natl Acad Sci USA.* 2014; 111(9):3286. <https://doi.org/10.1073/pnas.1302089111> PMID: 24596427
90. Imai C, Cheong HK, Kim H, Honda Y, Eum JH, Kim CT, et al. Associations between malaria and local and global climate variability in five regions in Papua New Guinea. *Trop Med Health.* 2016; 44:23. <https://doi.org/10.1186/s41182-016-0021-x> PMID: 27524928
91. Gilbert M, Brindle R. El Niño and variations in the prevalence of Plasmodium vivax and P. falciparum in Vanuatu. *Trans R Soc Trop Med Hyg.* 2009; 103(12):1285–7.
92. Smith J, Tahani L, Bobogare A, Bugoro H, Otto F, Fafale G, et al. Malaria early warning tool: linking inter-annual climate and malaria variability in northern Guadalcanal, Solomon Islands. *Malar J.* 2017; 16(1):472. <https://doi.org/10.1186/s12936-017-2120-5> PMID: 29162098
93. Agyekum TP, Botwe PK, Arko-Mensah J, Issah I, Acquah AA, Hogarh JN, et al. A Systematic Review of the Effects of Temperature on Anopheles Mosquito Development and Survival: Implications for Malaria Control in a Future Warmer Climate. *Int J Environ Res Public Health.* 2021; 18(14):7255. <https://doi.org/10.3390/ijerph18147255> PMID: 34299706
94. Rossati A, Bargiacchi O, Kroumova V, Zaramella M, Caputo A, Garavelli PL. Climate, environment and transmission of malaria. *Infez Med.* 2016; 24(2):93–104. PMID: 27367318
95. Reid H, Vallely A, Taleo G, Tatem AJ, Kelly G, Riley I, et al. Baseline spatial distribution of malaria prior to an elimination programme in Vanuatu. *Malar J.* 2010; 9:150. <https://doi.org/10.1186/1475-2875-9-150> PMID: 20525209
96. Mueller I, Taime J, Ivivi R, Yala S, Bjorge S, Riley ID, et al. The epidemiology of malaria in the Papua New Guinea highlands: 1. Western Highlands Province. *P N G Med J.* 2003; 46(1–2):16–31. PMID: 16450780
97. Mueller I, Bjorge S, Poigeno G, Kundi J, Tandrapah T, Riley ID, et al. The epidemiology of malaria in the Papua New Guinea highlands: 2. Eastern Highlands Province. *P N G Med J.* 2003; 46(3–4):166–79. PMID: 16454398
98. Mueller I, Kundi J, Bjorge S, Namuigi P, Saleu G, Riley ID, et al. The epidemiology of malaria in the Papua New Guinea highlands: 3. Simbu Province. *P N G Med J.* 2004; 47(3–4):159–73. PMID: 16862940
99. Mueller I, Namuigi P, Kundi J, Ivivi R, Tandrapah T, Bjorge S, et al. Epidemic malaria in the highlands of Papua New Guinea. *Am J Trop Med Hyg.* 2005; 72(5):554–60. PMID: 15891129
100. Mueller I, Ousari M, Yala S, Ivivi R, Sie A, Reeder JC. The epidemiology of malaria in the Papua New Guinea highlands: 4. Enga Province. *P N G Med J.* 2006; 49(3–4):115–25. PMID: 18389969

101. Mueller I, Sie A, Ousari M, Iga J, Yala S, Ivivi R, et al. The epidemiology of malaria in the Papua New Guinea highlands: 5. Aseki, Menyamyama and Wau-Bulolo, Morobe Province. *P N G Med J.* 2007; 50(3–4):111–22. PMID: [19583094](#)
102. Mueller I, Yala S, Ousari M, Kundi J, Ivivi R, Saleu G, et al. The epidemiology of malaria in the Papua New Guinea highlands: 6. Simbai and Bundi, Madang Province. *P N G Med J.* 2007; 50(3–4):123–33. PMID: [19583095](#)
103. Costa F, Hagan JE, Calcagno J, Kane M, Torgerson P, Martinez-Silveira MS, et al. Global Morbidity and Mortality of Leptospirosis: A Systematic Review. *Plos Negl Trop Dis.* 2015; 9(9). <https://doi.org/10.1371/journal.pntd.0003898> PMID: [26379143](#)
104. Victoriano AFB, Smythe LD, Gloriani-Barzaga N, Cavinta LL, Kasai T, Limpakamjanarat K, et al. Leptospirosis in the Asia Pacific region. *BMC Infect Dis.* 2009; 9(1):147–147. <https://doi.org/10.1186/1471-2334-9-147> PMID: [19732423](#)
105. Berlioz-Arthaud A, Mérien F, Baranton G. [Laboratory based human leptospirosis surveillance in New Caledonia (2001–2005)]. *Bull Soc Pathol Exot.* 2007; 100(2):133–138.
106. Lau CL, Mayfield H, Lowry JH, Watson CH, Kama M, Nilles EJ, et al. Unravelling infectious disease eco-epidemiology using Bayesian networks and scenario analysis: A case study of leptospirosis in Fiji. *Environ Modell Softw.* 2017; 97:271–286.
107. Lau CL, Dobson AJ, Smythe LD, Fearnley EJ, Skelly C, Clements ACA, et al. Leptospirosis in American Samoa 2010: epidemiology, environmental drivers, and the management of emergence. *Am J Trop Med Hyg.* 2012; 86(2):309–19. <https://doi.org/10.4269/ajtmh.2012.11-0398> PMID: [22302868](#)
108. Lau CL, Clements ACA, Skelly C, Dobson AJ, Smythe LD, Weinstein P. Leptospirosis in American Samoa—estimating and mapping risk using environmental data. *PLoS Negl Trop Dis.* 2012; 6(5): e1669. <https://doi.org/10.1371/journal.pntd.0001669> PMID: [22666516](#)
109. Togami E, Kama M, Goarant C, Craig SB, Lau C, Ritter JM, et al. A Large Leptospirosis Outbreak following Successive Severe Floods in Fiji, 2012. *Am J Trop Med Hyg.* 2018; 99(4):849–51. <https://doi.org/10.4269/ajtmh.18-0335> PMID: [30141390](#)
110. Weinberger D, Baroux N, Grangeon JP, Ko AI, Goarant C. El Niño Southern Oscillation and leptospirosis outbreaks in New Caledonia. *PLoS Negl Trop Dis.* 2014; 8(4):e2798.
111. Massenet D, Yvon J-F, Couteaux C, Goarant C. An Unprecedented High Incidence of Leptospirosis in Futuna, South Pacific, 2004–2014, Evidenced by Retrospective Analysis of Surveillance Data. *PLoS One.* 2015; 10(11):e0142063–NA. <https://doi.org/10.1371/journal.pone.0142063> PMID: [26528546](#)
112. Mayfield H, Smith C, Lowry JH, Watson CH, Baker MG, Kama M, et al. Predictive risk mapping of an environmentally-driven infectious disease using spatial Bayesian networks: A case study of leptospirosis in Fiji. *Plos Neglect Trop Dis.* 2018; 12(10):e0006857. <https://doi.org/10.1371/journal.pntd.0006857> PMID: [30307936](#)
113. Mayfield HJ, Lowry JH, Watson CH, Kama M, Nilles EJ, Lau C. Use of geographically weighted logistic regression to quantify spatial variation in the environmental and sociodemographic drivers of leptospirosis in Fiji: a modelling study. *Lancet Planet Health.* 2018; 2(5):e223–e232. [https://doi.org/10.1016/S2542-5196\(18\)30066-4](https://doi.org/10.1016/S2542-5196(18)30066-4) PMID: [29709286](#)
114. Mwachui MA, Crump L, Hartskeerl RA, Zinsstag J, Hattendorf J. Environmental and Behavioural Determinants of Leptospirosis Transmission: A Systematic Review. *Plos Neglect Trop Dis.* 2015; 9(9):e0003843. <https://doi.org/10.1371/journal.pntd.0003843> PMID: [26379035](#)
115. Lau CL, Smythe LD, Craig SB, Weinstein P. Climate change, flooding, urbanisation and leptospirosis: fuelling the fire? *Trans R Soc Trop Med Hyg.* 2010; 104(10):631–8. <https://doi.org/10.1016/j.trstmh.2010.07.002> PMID: [20813388](#)
116. Jones FK, Ko AI, Becha C, Joshua C, Musto J, Thomas S, et al. Increased Rotavirus Prevalence in Diarrheal Outbreak Precipitated by Localized Flooding, Solomon Islands, 2014. *Emerg Infect Dis.* 2016; 22(5):875–9. <https://doi.org/10.3201/eid2205.151743> PMID: [27088272](#)
117. Carlton EJ, Woster AP, DeWitt P, Goldstein RS, Levy K. A systematic review and meta-analysis of ambient temperature and diarrhoeal diseases. *Int J Epidemiol.* 2016; 45(1):117–130. <https://doi.org/10.1093/ije/dyv296> PMID: [26567313](#)
118. Liang M, Ding X, Wu Y, Sun Y. Temperature and risk of infectious diarrhea: a systematic review and meta-analysis. *Environ Sci Pollut Res.* 2021; 28(48):68144–68154. <https://doi.org/10.1007/s11356-021-15395-z> PMID: [34268683](#)
119. Singh RB, Hales S, de Wet N, Raj R, Hearnden M, Weinstein P. The influence of climate variation and change on diarrheal disease in the Pacific Islands. *Environ Health Perspect.* 2001; 109(2):155–9. <https://doi.org/10.1289/ehp.01109155> PMID: [11266326](#)
120. Kraay ANM, Man O, Levy MC, Levy K, Ionides E, Eisenberg JNS. Understanding the Impact of Rainfall on Diarrhea: Testing the Concentration-Dilution Hypothesis Using a Systematic Review and Meta-

- Analysis. *Environ Health Perspect*. 2020; 128(12):126001. <https://doi.org/10.1289/EHP6181> PMID: 33284047
121. Emont JP, Ko AI, Homasi-Paelate A, Ituaso-Conway N, Nilles EJ. Epidemiological Investigation of a Diarrhea Outbreak in the South Pacific Island Nation of Tuvalu During a Severe La Niña-Associated Drought Emergency in 2011. *Am J Trop Med Hyg*. 2017; 96(3):576–82.
  122. Thompson CN, Kama M, Acharya S, Bera U, Clemens J, Crump JA, et al. Typhoid fever in Fiji: a reversible plague? *Tropical medicine & international health*. 2014; 19(10):1284–92. <https://doi.org/10.1111/tmi.12367> PMID: 25066005
  123. Scobie HM, Nilles E, Kama M, Kool JL, Mintz E, Wannemuehler KA, et al. Impact of a Targeted Typhoid Vaccination Campaign Following Cyclone Tomas, Republic of Fiji, 2010. *Am J Trop Med Hyg*. 2014; 90(6):1031–8. <https://doi.org/10.4269/ajtmh.13-0728> PMID: 24710618
  124. de Alwis R, Watson C, Nikolay B, Lowry JH, Thieu NTV, Van TT, et al. Role of Environmental Factors in Shaping Spatial Distribution of *Salmonella enterica* Serovar Typhi, Fiji. *Emerg Infect Dis*. 2018; 24(2):284–93. <https://doi.org/10.3201/eid2402.170704> PMID: 29350150
  125. Jenkins A, Jupiter SD, Mueller U, Jenney A, Vosaki G, Rosa V, et al. Health at the Sub-catchment Scale: Typhoid and Its Environmental Determinants in Central Division, Fiji. *EcoHealth*. 2016; 13(4):633–51. <https://doi.org/10.1007/s10393-016-1152-6> PMID: 27557784
  126. Bhaskaran K, Gasparrini A, Hajat S, Smeeth L, Armstrong B. Time series regression studies in environmental epidemiology. *Int J Epidemiol*. 2013; 42(4):1187–95. <https://doi.org/10.1093/ije/dyt092> PMID: 23760528
  127. Mcleod E, Bruton-Adams M, Förster J, Franco C, Gaines G, Gorong B, et al. Lessons From the Pacific Islands—Adapting to Climate Change by Supporting Social and Ecological Resilience. *Front Mar Sci*. 2019; 6.
  128. Hadwen WL, Powell B, MacDonald MC, Elliott M, Chan T, Gernjak W, et al. Putting WASH in the water cycle: climate change, water resources and the future of water, sanitation and hygiene challenges in Pacific Island Countries. *J Water Sanit Hyg Dev*. 2015; 5(2):183–191.
  129. Lugten E, Hariharan N. Strengthening Health Systems for Climate Adaptation and Health Security: Key Considerations for Policy and Programming. *Health Secur* 2022; 20(5):435–439. <https://doi.org/10.1089/hs.2022.0050> PMID: 35904944
  130. Arroyave WD, Mehta SS, Guha N, Schwingl P, Taylor KW, Glenn B, et al. Challenges and recommendations on the conduct of systematic reviews of observational epidemiologic studies in environmental and occupational health. *J Expo Sci Environ Epidemiol*. 2021; 31(1):21–30. <https://doi.org/10.1038/s41370-020-0228-0> PMID: 32415298
  131. Secretariat of the Pacific Regional Environmental Programme (SPREP). Pacific Climate Change Portal 2020 Available from: <https://www.pacificclimatechange.net/>
  132. The Pacific Community (SPC). Pacific Public Health Surveillance Network. Available from: <https://www.pphsn.net/>
  133. Pacific Community (SPC). Pacific Data Hub 2023. Available from: <https://pacificdata.org/>
  134. Morin CW, Semenza JC, Trtanj JM, Glass GE, Boyer C, Ebi KL. Unexplored Opportunities: Use of Climate- and Weather-Driven Early Warning Systems to Reduce the Burden of Infectious Diseases. *Curr Environ Health Rep*. 2018; 5(4):430–8. <https://doi.org/10.1007/s40572-018-0221-0> PMID: 30350265
  135. Woodward A, Scheraga JD. Chapter 4: Looking to the future: challenges for scientists studying climate change and health. In: *Climate change and human health—risks and responses*. McMichael AJ, Campbell-Lendrum DH, Corvalan CF, Ebi KL, Githeko AK, Scheraga JD, Woodward A (eds). Geneva, Switzerland. World Health Organisation. 2003: pp. 61–79.
  136. McIver L, Hales S, Deark K, Kim R. Early warning systems for climate-sensitive infectious diseases in Fiji: lessons learned and next steps *Fiji J Public Health*. 2014; 3(3):8–16.
  137. Solomon Islands Government Meteorological Services Division. MalaClim Seasonal Rainfall Watch. Solomon Islands. 2018. Available from: <https://met.gov.sb/dna-faqs/>
